# Supplementary material for: Rhodium(ii) catalyzed diastereoselective reactions of diazoacetamides with isatins: an efficient approach to 3-hydroxy-3,3′-bioxindoles
Source: Royal Society of Chemistry journal article supplement (doi:10.1039/c2ob26580j), 2012-01-01

# **Rhodium(II) catalyzed diastereoselective reactions of diazoacetamides with isatins: an efficient approach to 3-hydroxy-3,3'-bioxindoles**

Ming Li<sup>†</sup>, Li Zan<sup>†</sup>, Dipak Prajapati<sup>‡</sup> and Wenhao Hu<sup>\*†</sup>

<sup>†</sup>Shanghai Engineering Research Centre of Molecular Therapeutics and New Drug Development, East China Normal University, Shanghai, 200062, China. E-mail: [whu@chem.ecnu.edu.cn](mailto:whu@chem.ecnu.edu.cn); Fax: (+86)021-62233176. <sup>‡</sup> Medicinal Chemistry Division, North East Institute of Science and Technology, Jorhat - 785 006, Assam, India.

## **Supporting Information**

### **Table of Contents**

1. Crystal data for **3a**
2. NMR analysis spectra for **3a-3s**
3. LC-MS spectrum for **3d**

## 1. Crystal data of 3a (CCDC 880451)

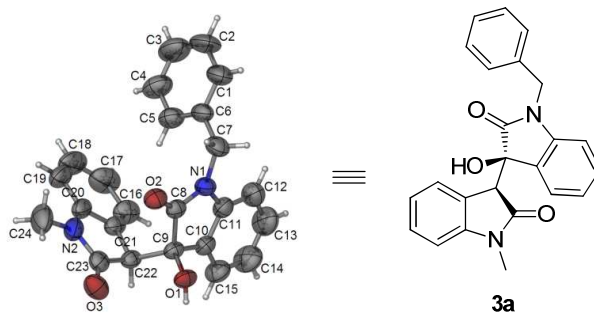

|                        |                                      |                                 |
|------------------------|--------------------------------------|---------------------------------|
| Bond precision:        | C-C = 0.0036 Å                       | Wavelength=0.71073              |
| Cell:                  | a=24.8142(10)      b=8.6804(3)       | c=18.1721(7)                    |
|                        | alpha=90              beta=99.492(1) | gamma=90                        |
| Temperature:           | 296 K                                |                                 |
|                        | Calculated                           | Reported                        |
| Volume                 | 3860.6(3)                            | 3860.6(3)                       |
| Space group            | C 2/c                                | C2/c                            |
| Hall group             | -C 2yc                               | ?                               |
| Moiety formula         | C24 H20 N2 O3                        | ?                               |
| Sum formula            | C24 H20 N2 O3                        | C24 H20 N2 O3                   |
| Mr                     | 384.42                               | 384.42                          |
| Dx,g cm <sup>-3</sup>  | 1.323                                | 1.323                           |
| Z                      | 8                                    | 8                               |
| Mu (mm <sup>-1</sup> ) | 0.088                                | 0.088                           |
| F000                   | 1616.0                               | 1616.0                          |
| F000'                  | 1616.72                              |                                 |
| h,k,lmax               | 29,10,21                             | 29,10,21                        |
| Nref                   | 3411                                 | 3409                            |
| Tmin,Tmax              | 0.978,0.986                          | 0.978,0.986                     |
| Tmin'                  | 0.978                                |                                 |
| Correction method=     | MULTI-SCAN                           |                                 |
| Data completeness=     | 0.999                                | Theta(max)= 25.010              |
| R(reflections)=        | 0.0421( 2313)                        | wR2(reflections)= 0.1172( 3409) |
| S =                    | 1.016                                | Npar= 262                       |

## 2. NMR analysis spectra for 3a-3s

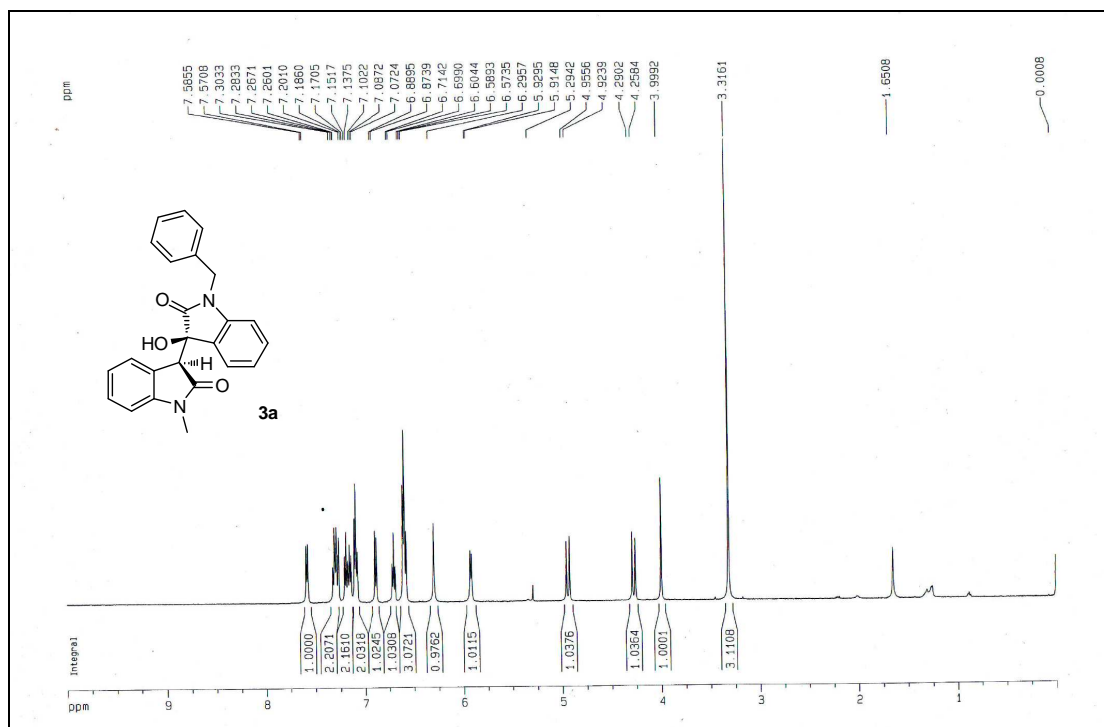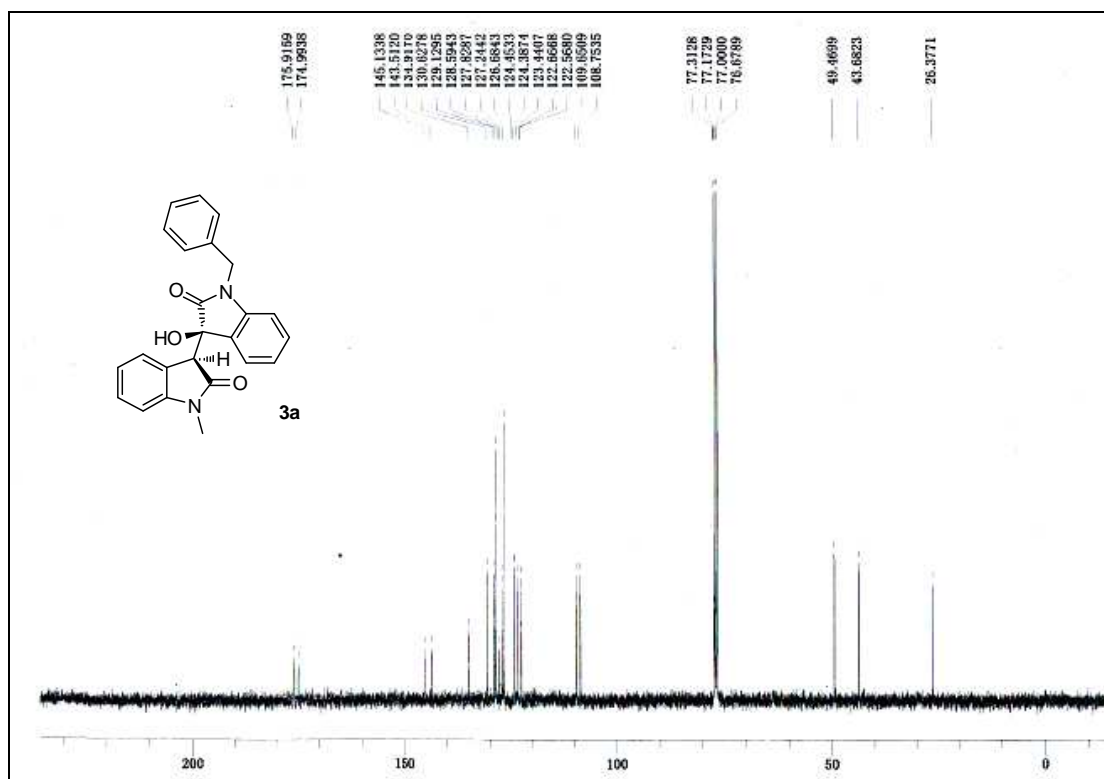

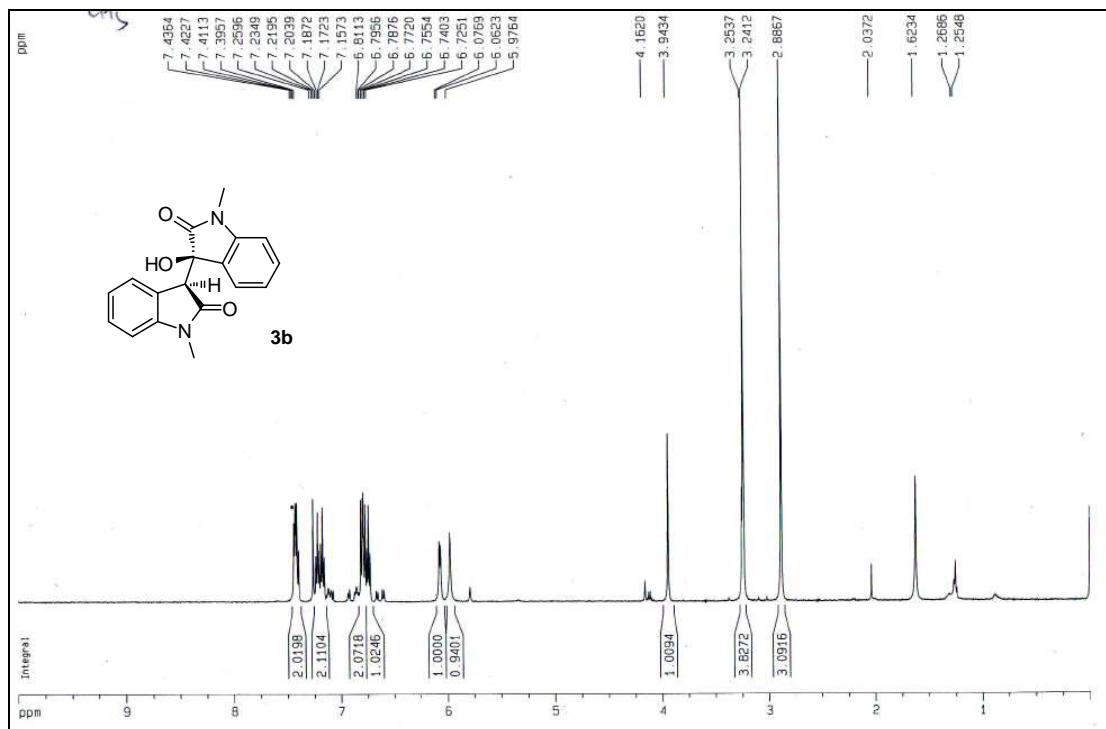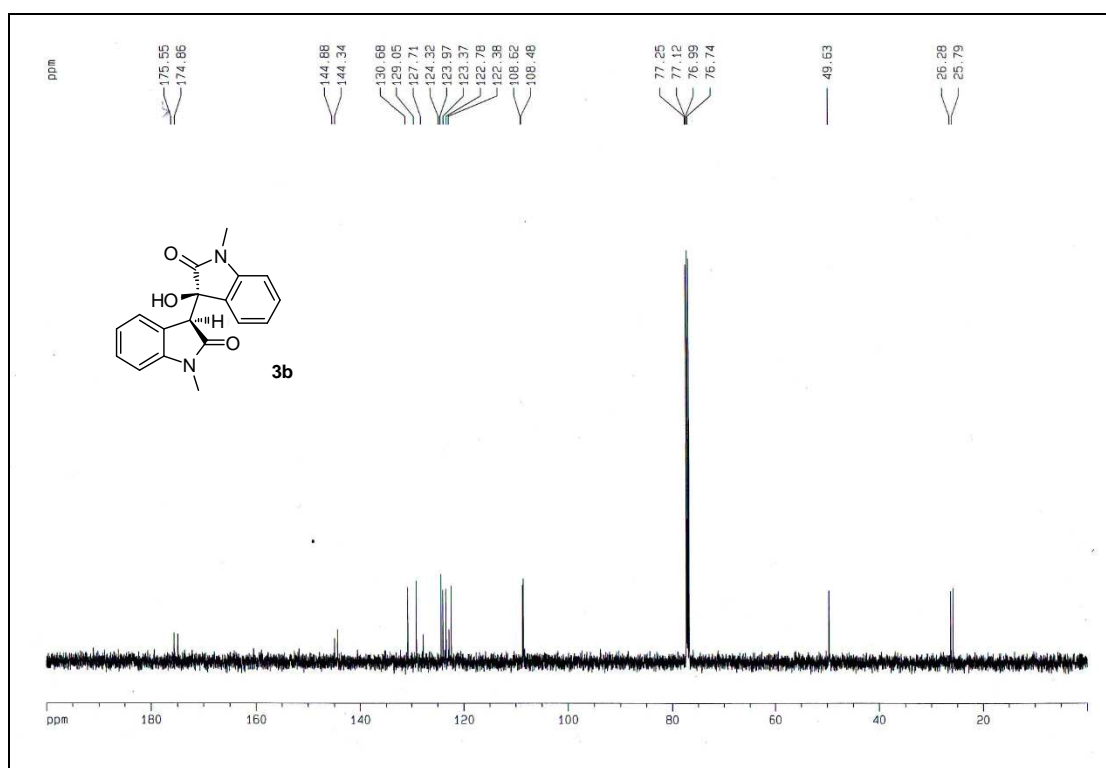

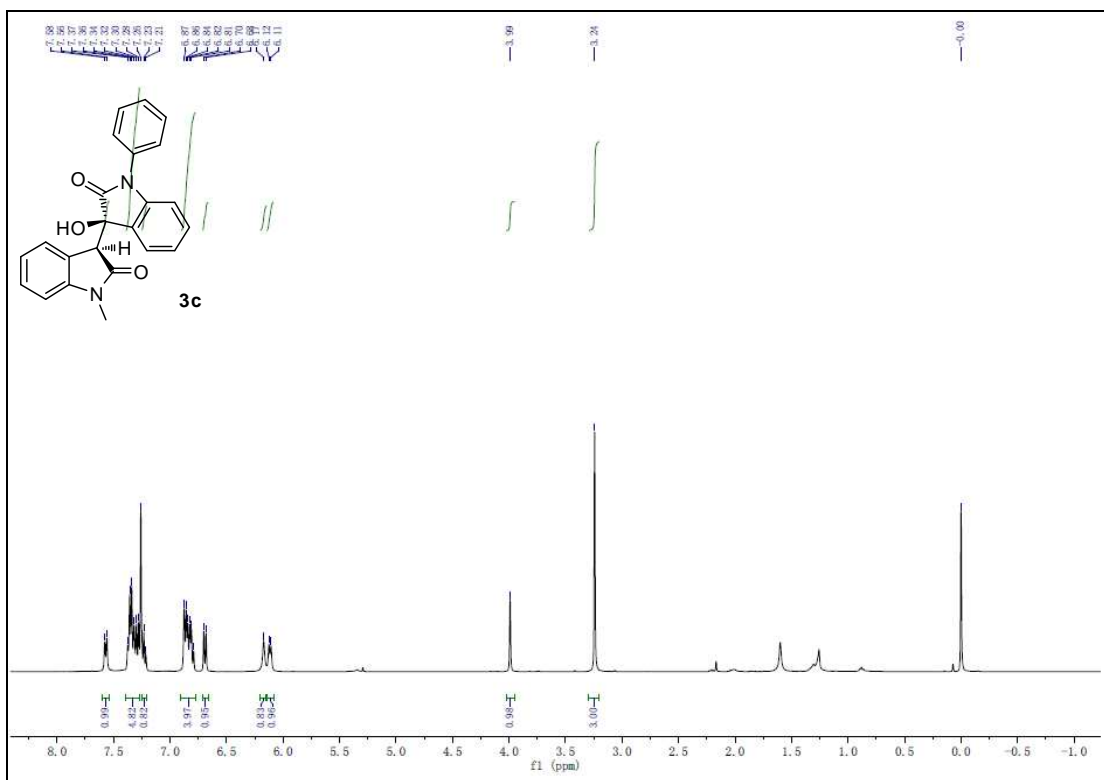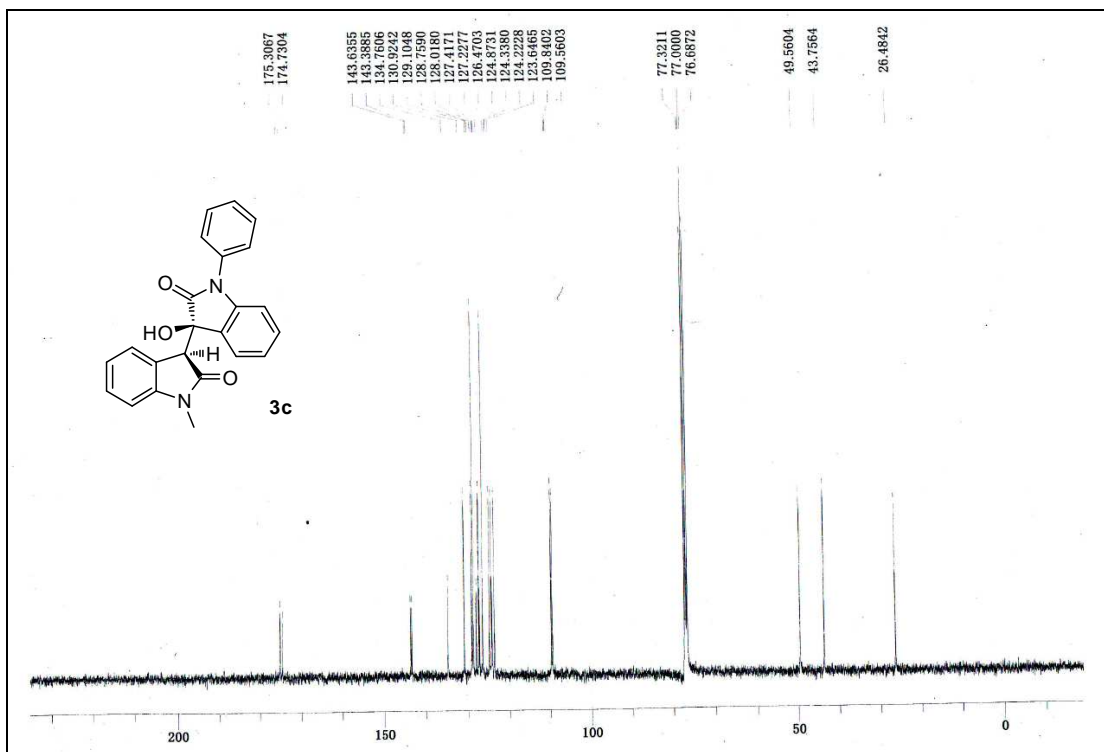

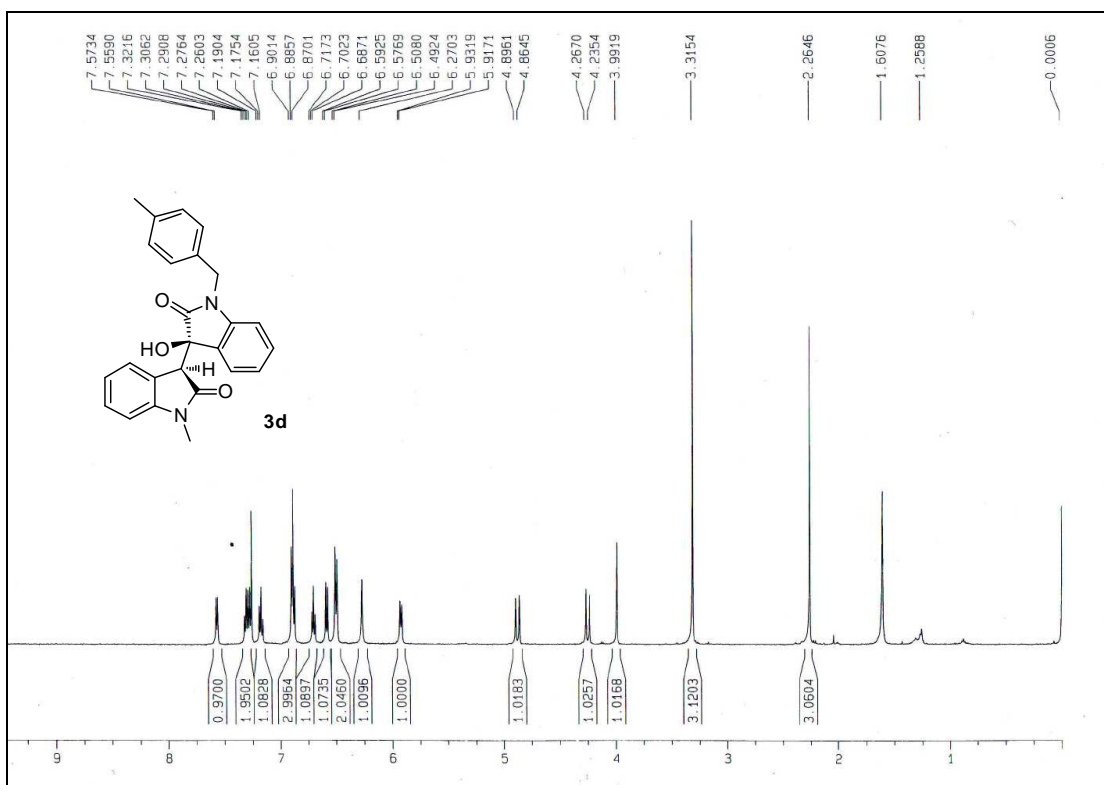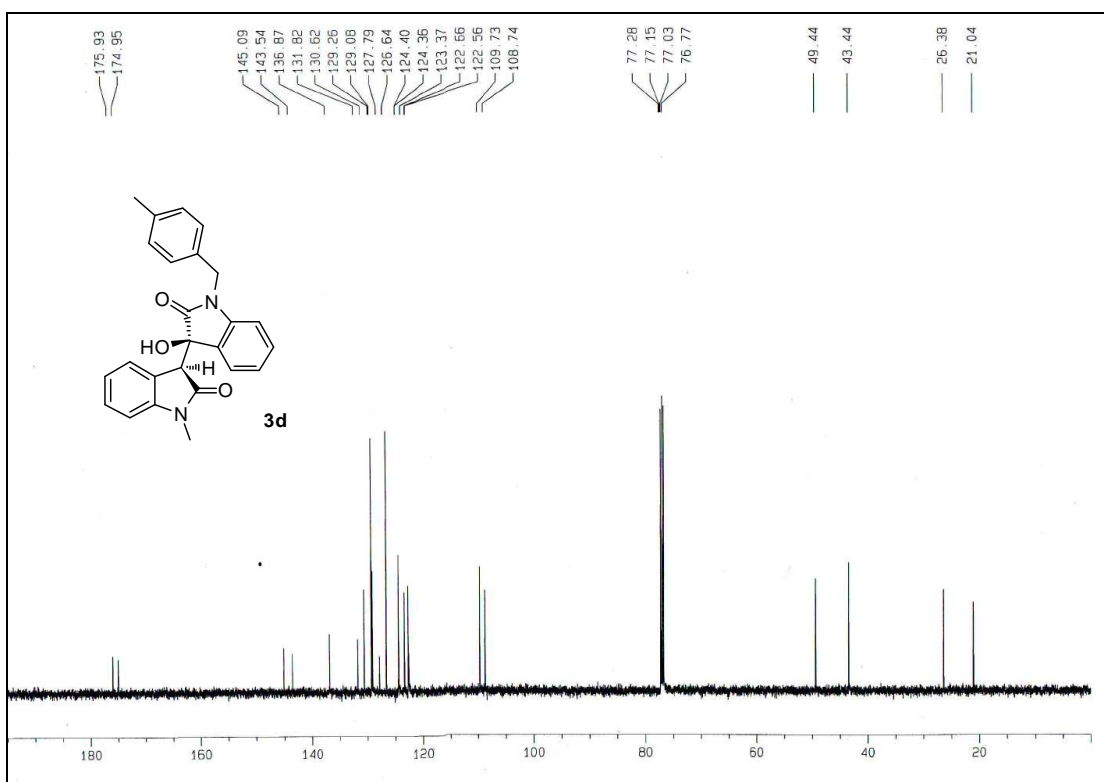

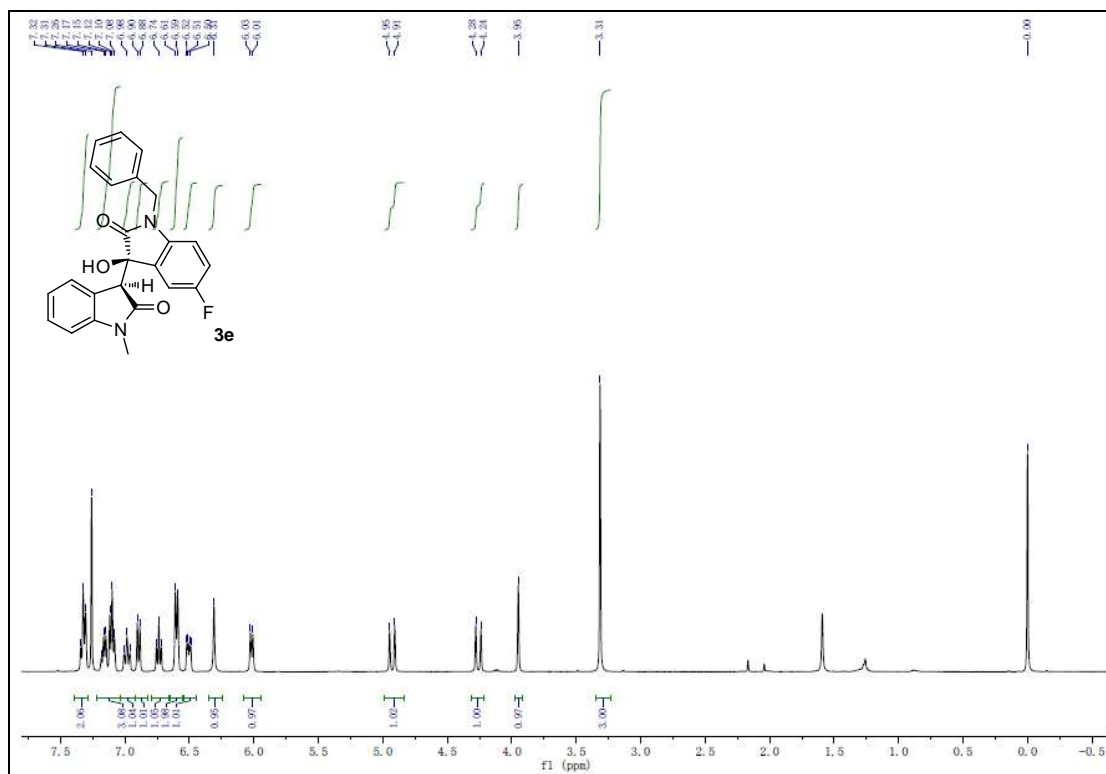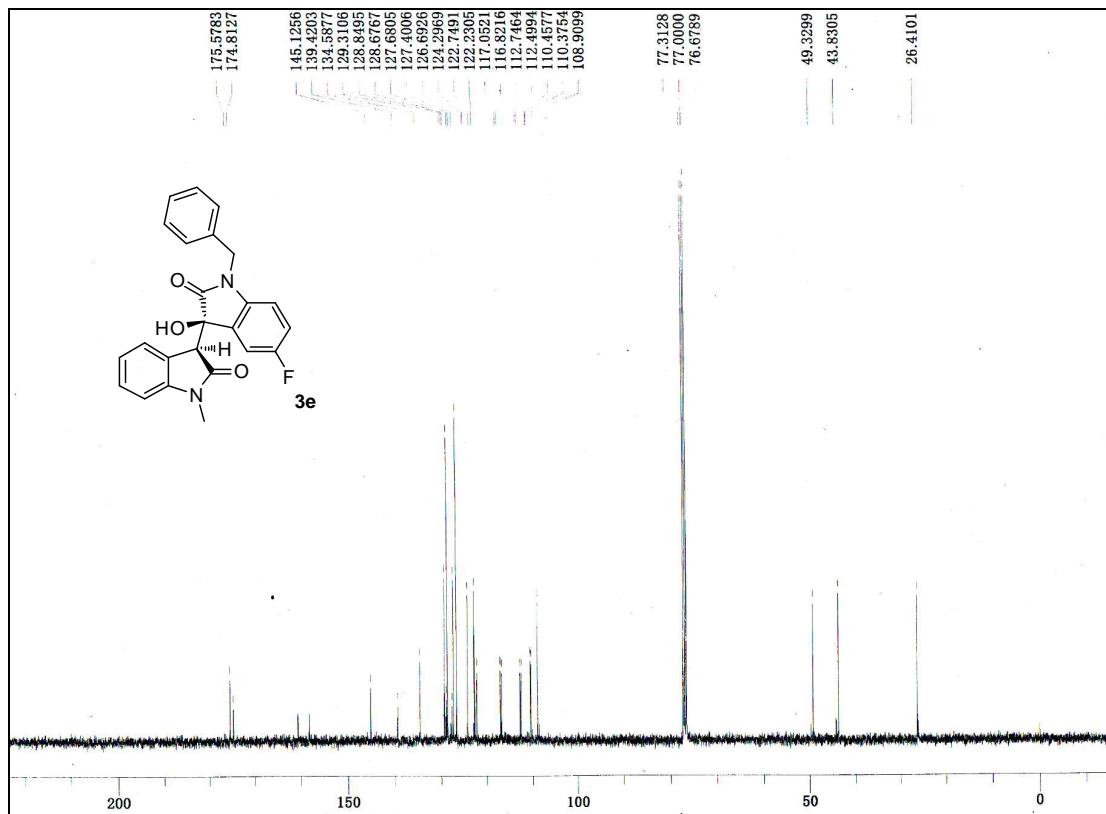

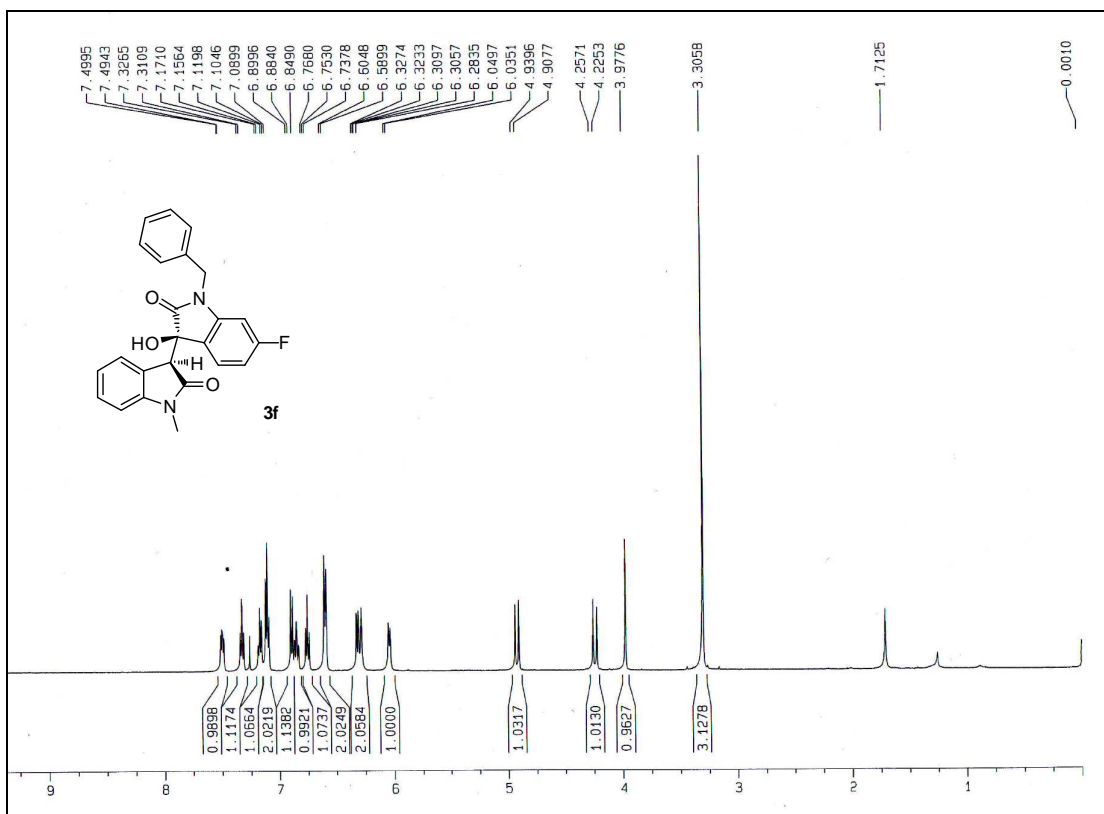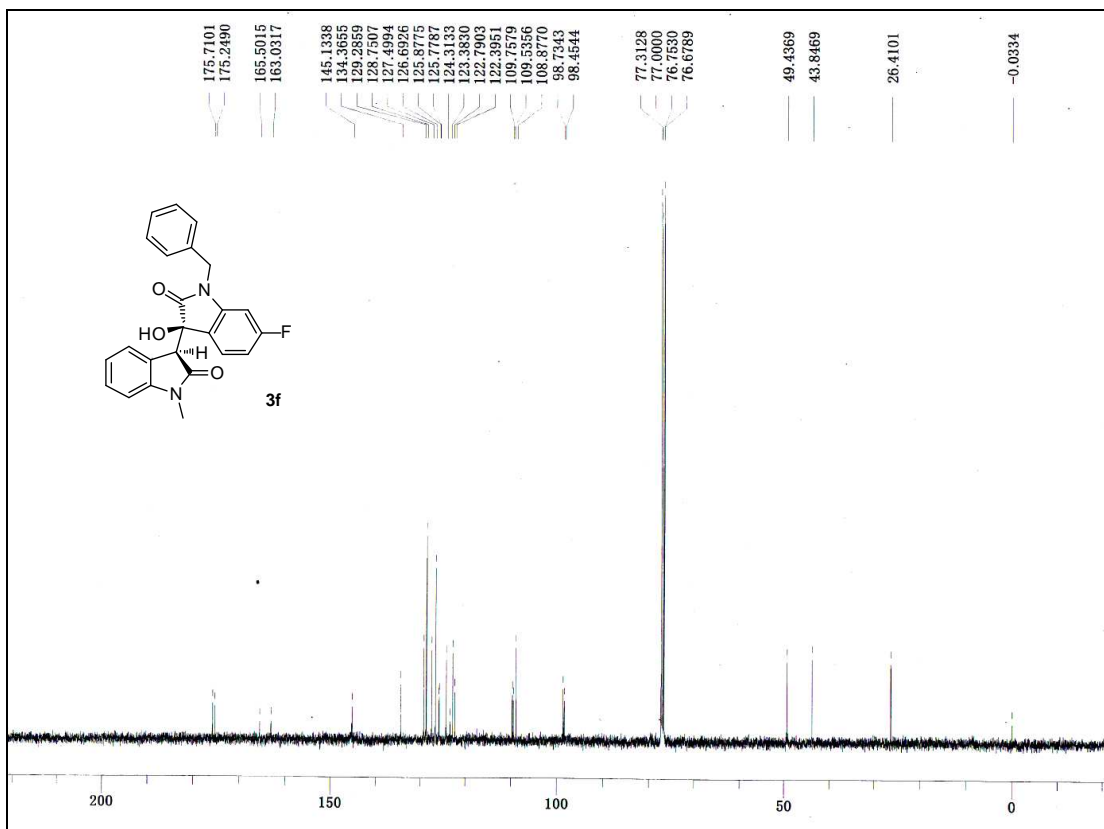



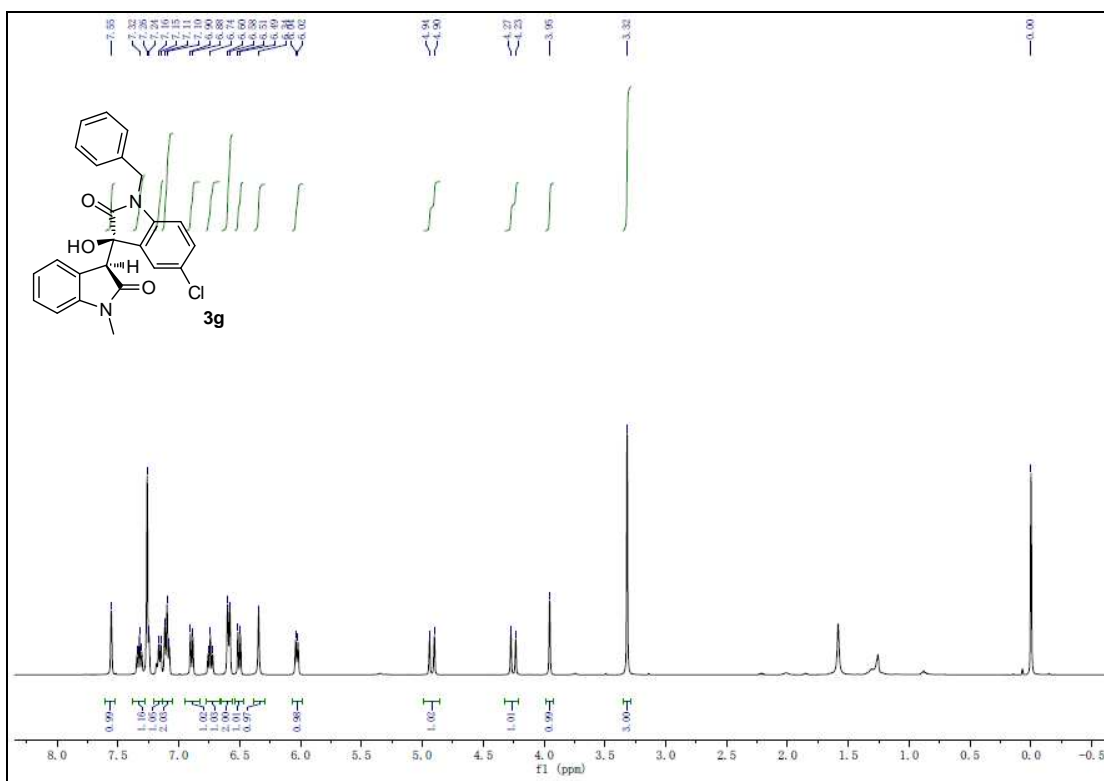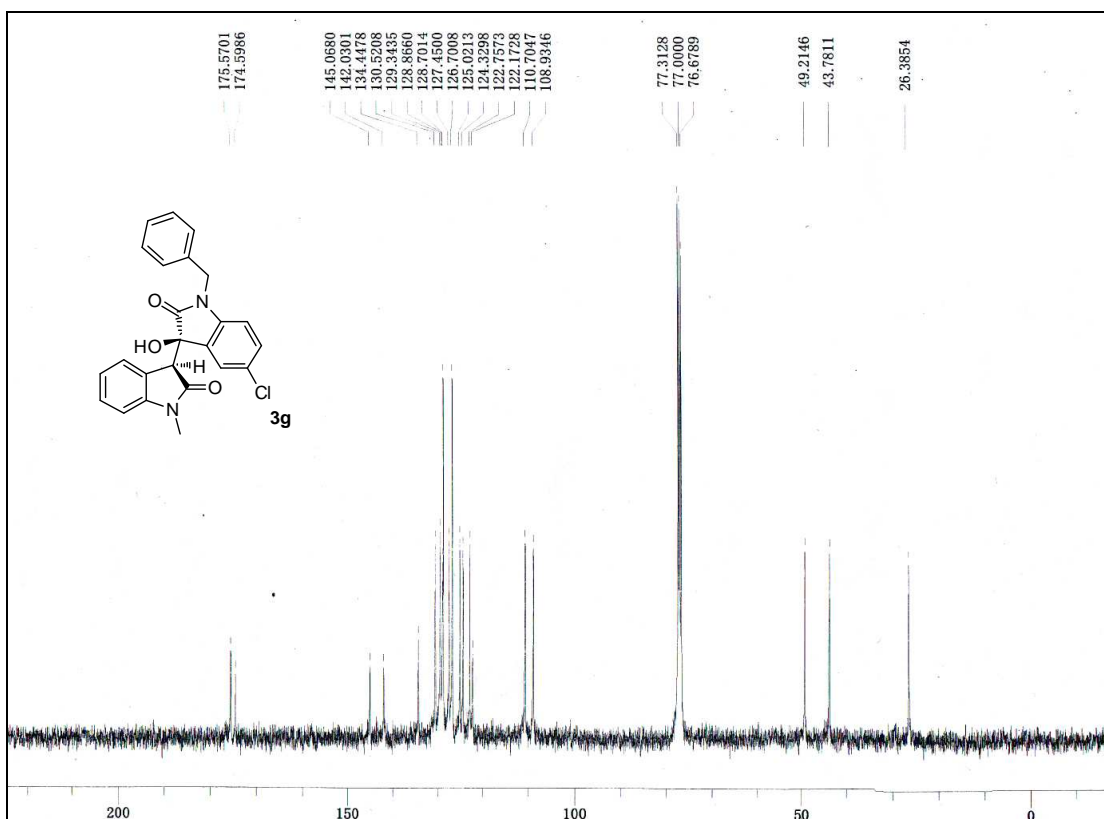

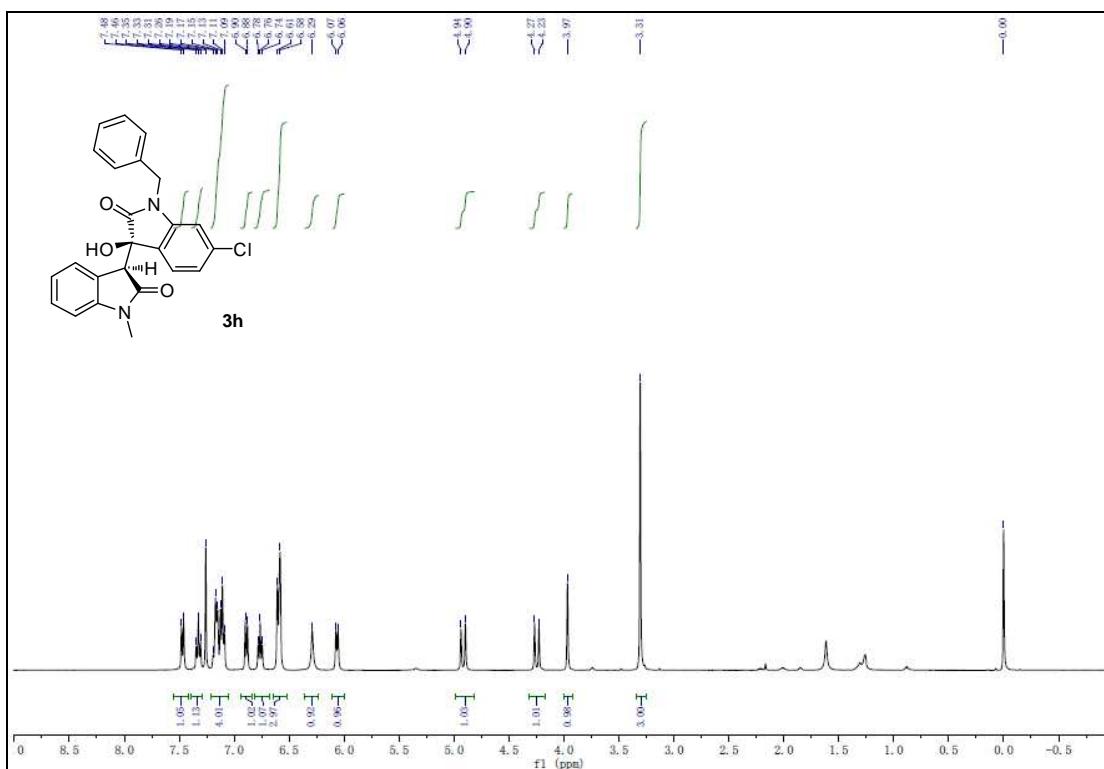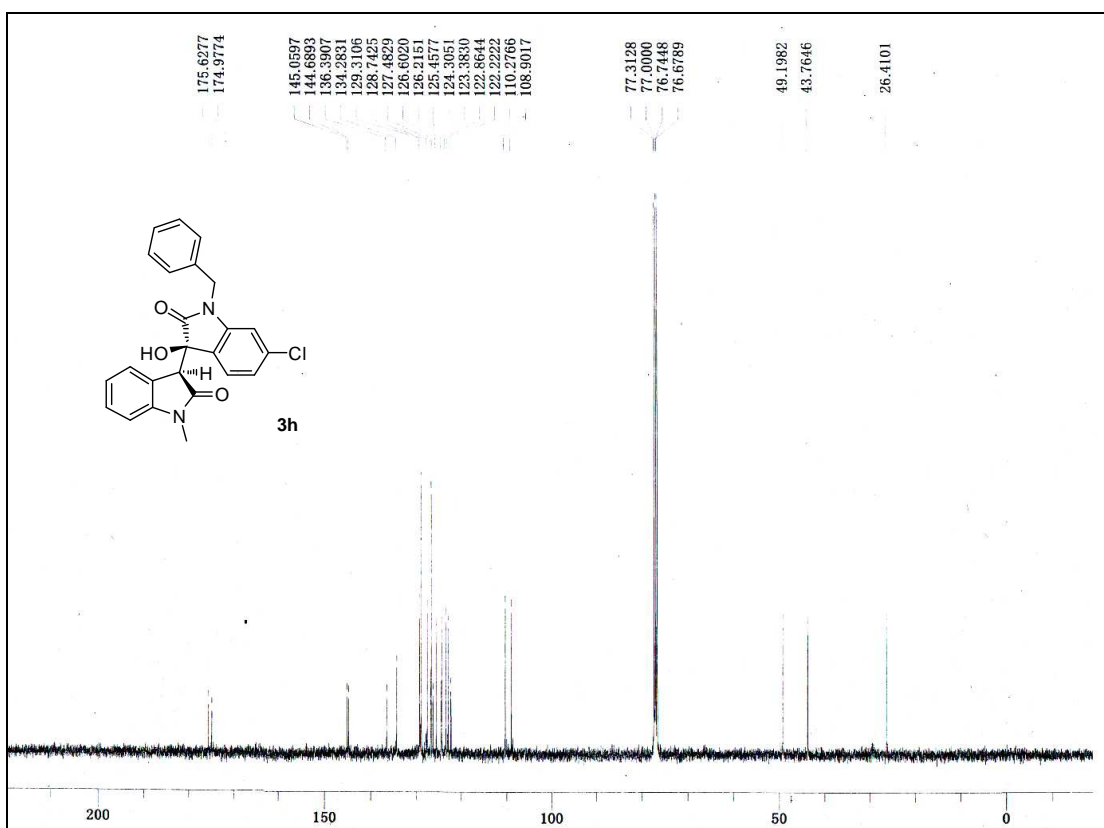

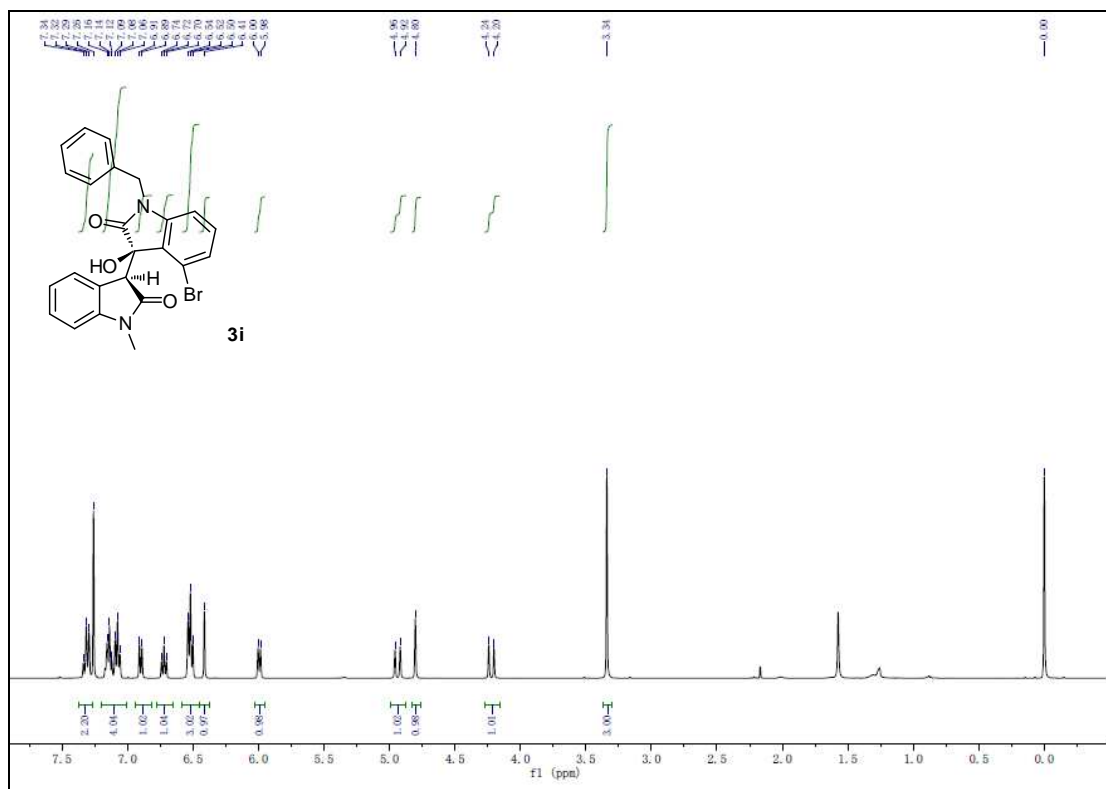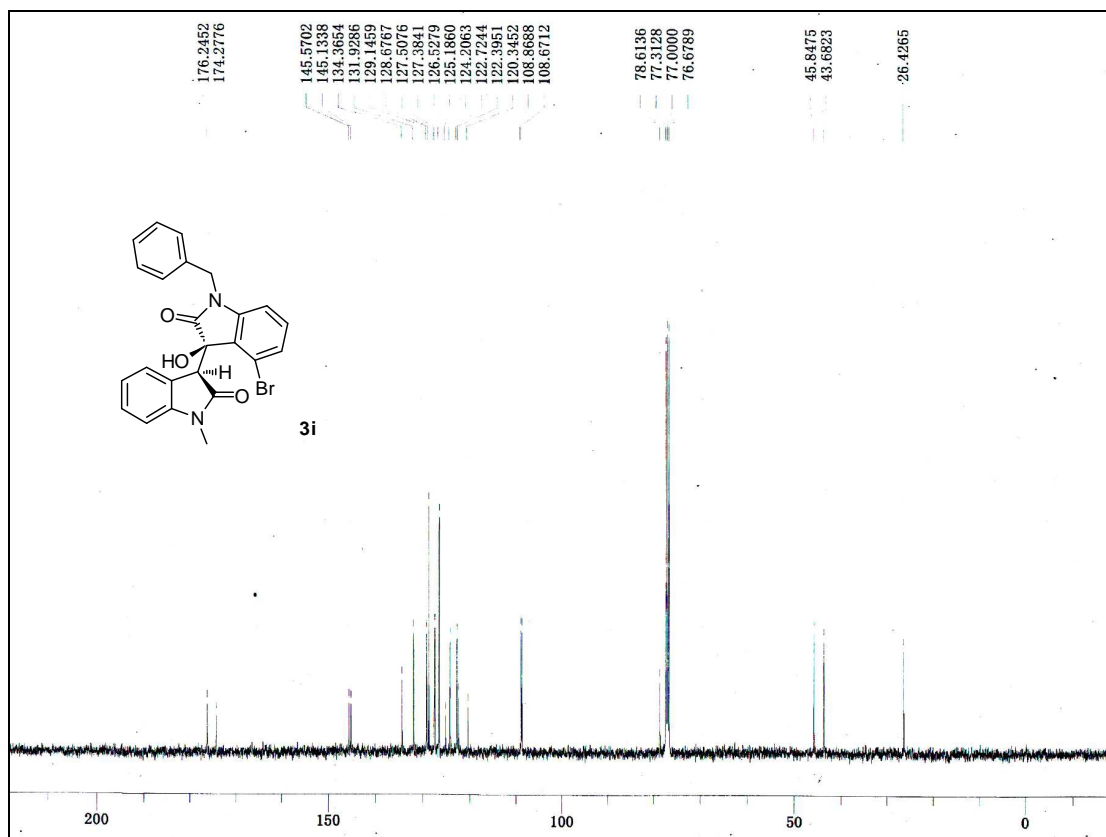

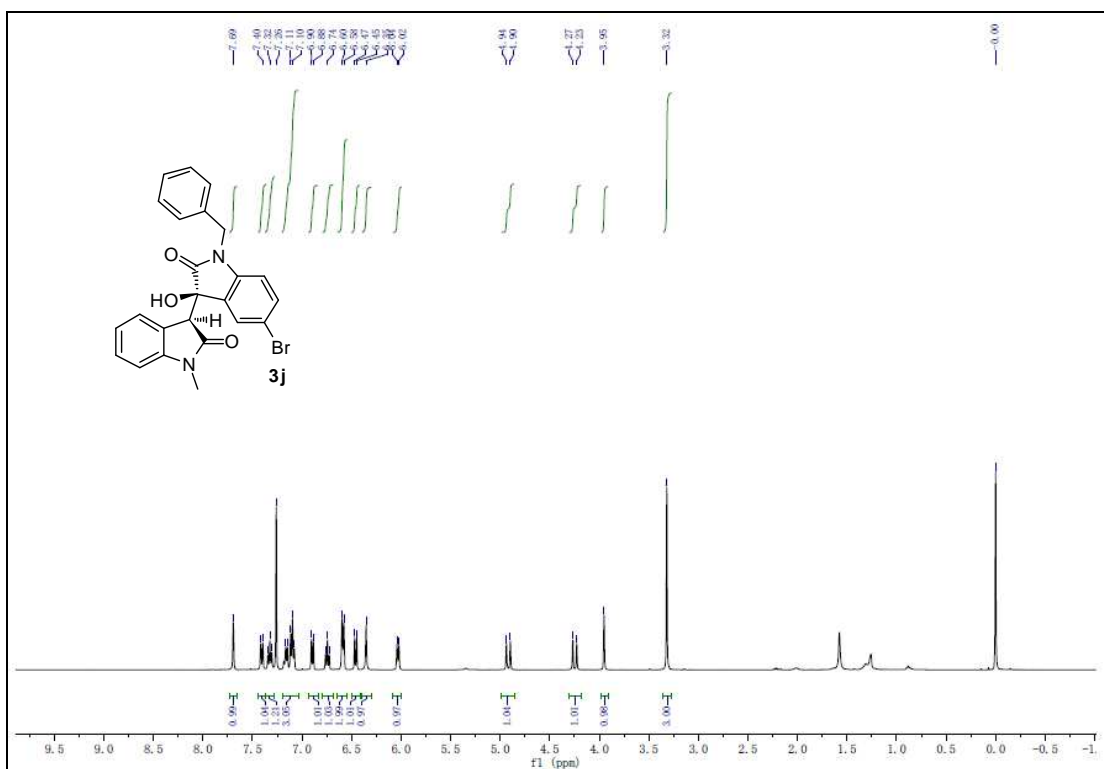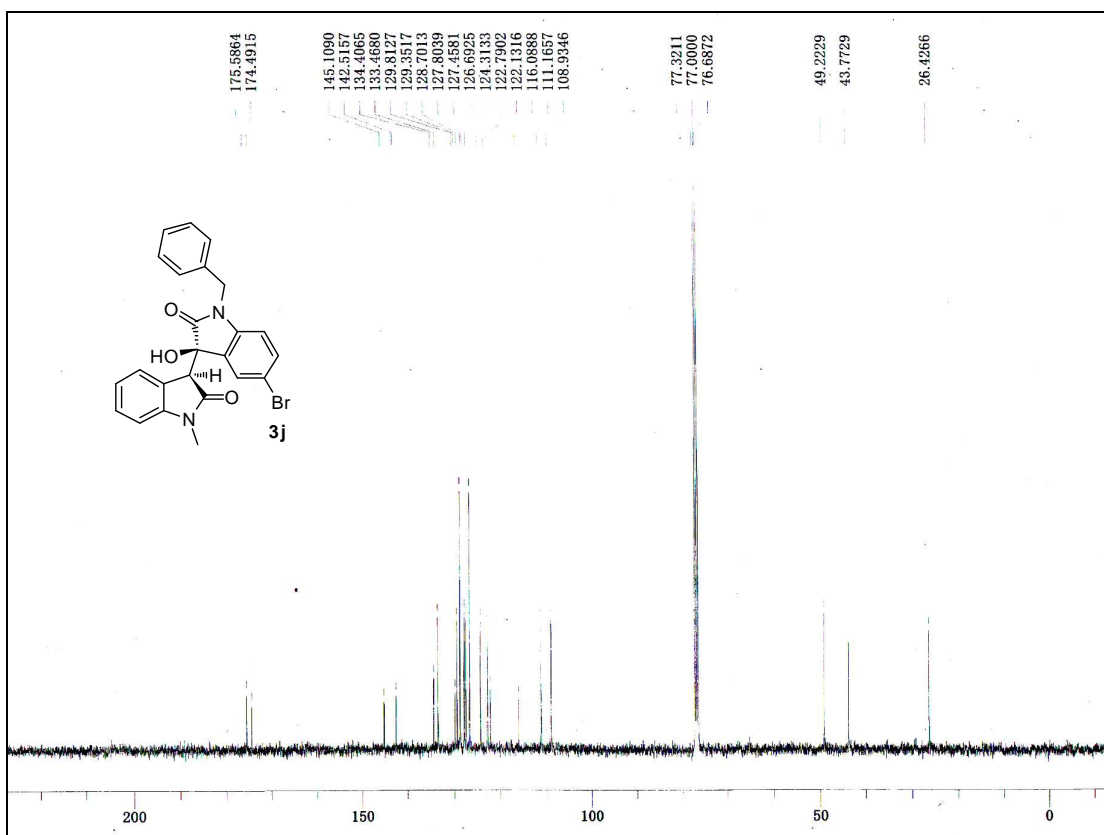

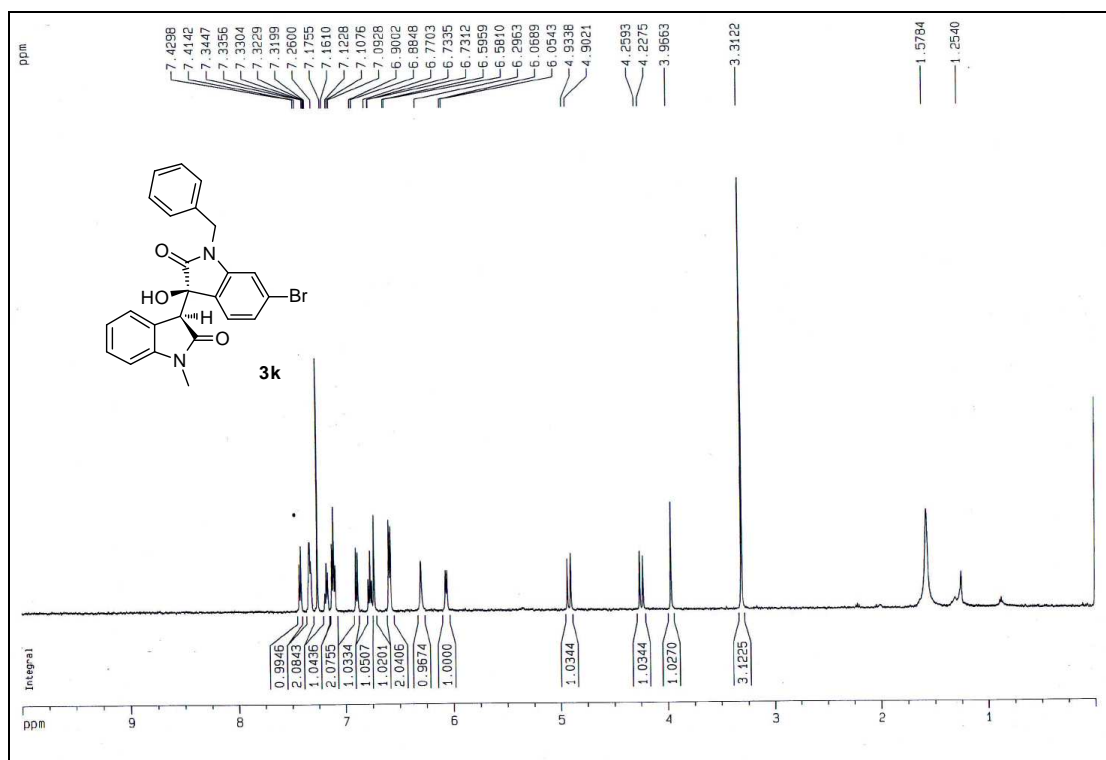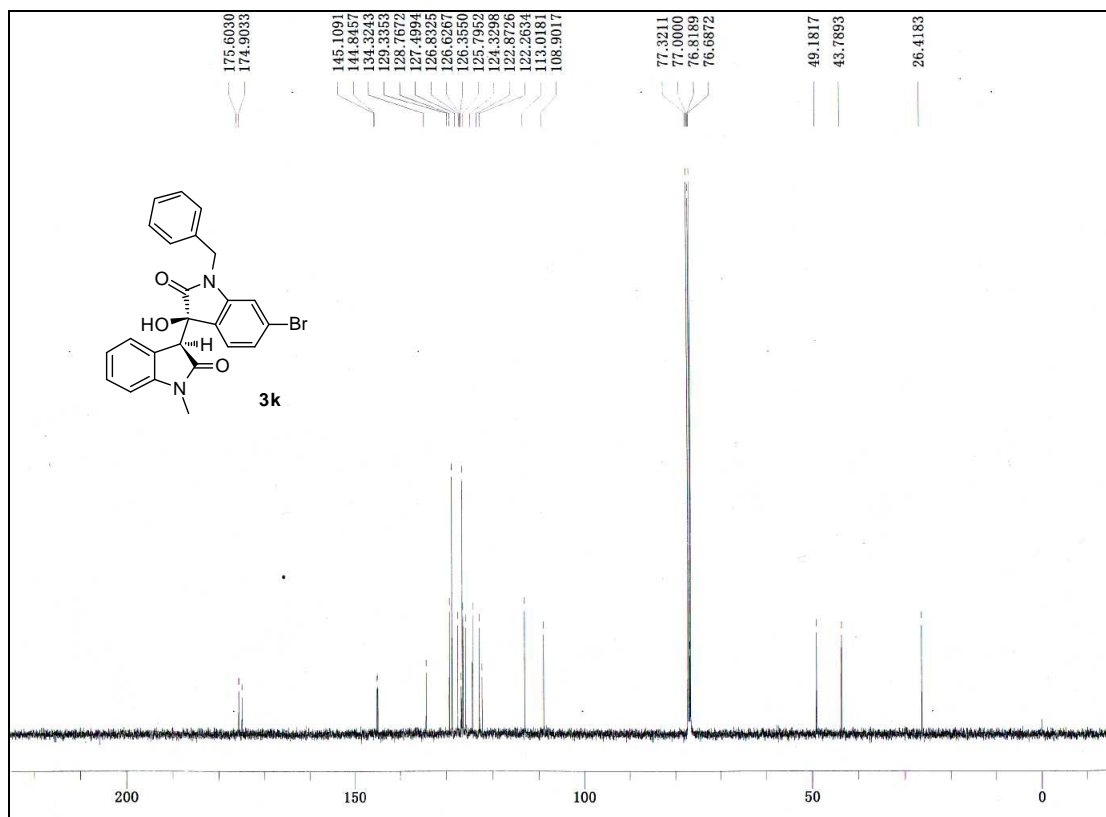

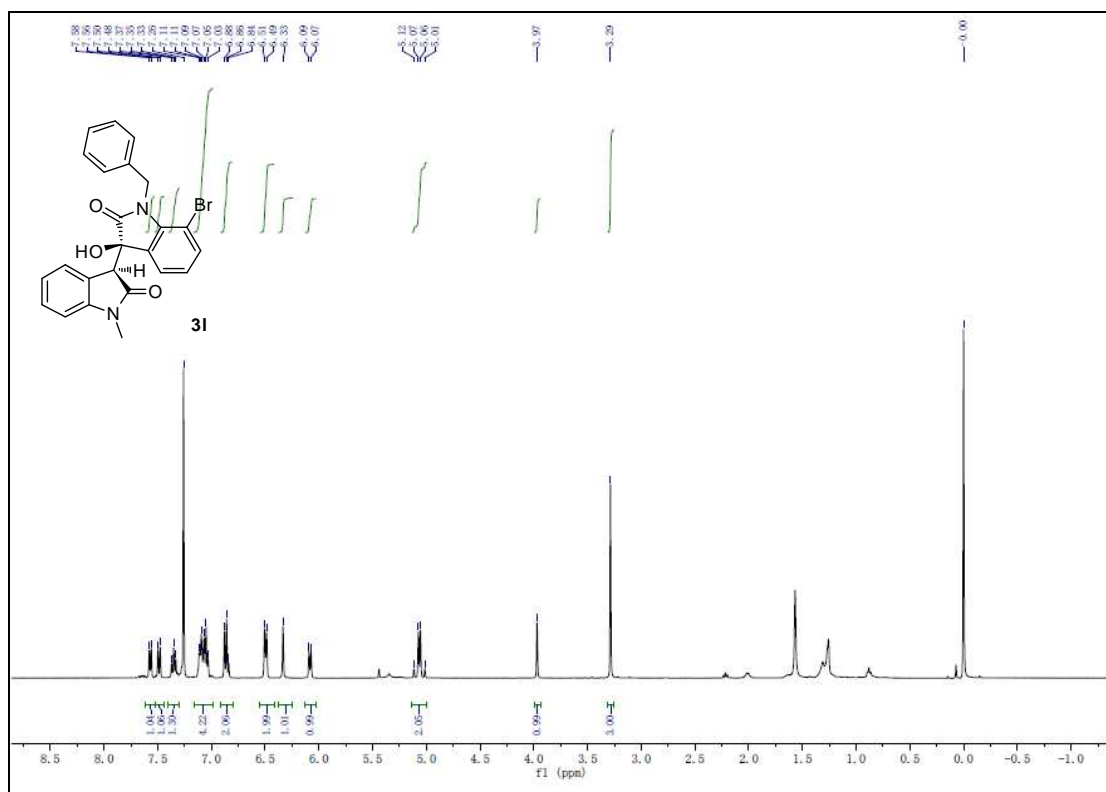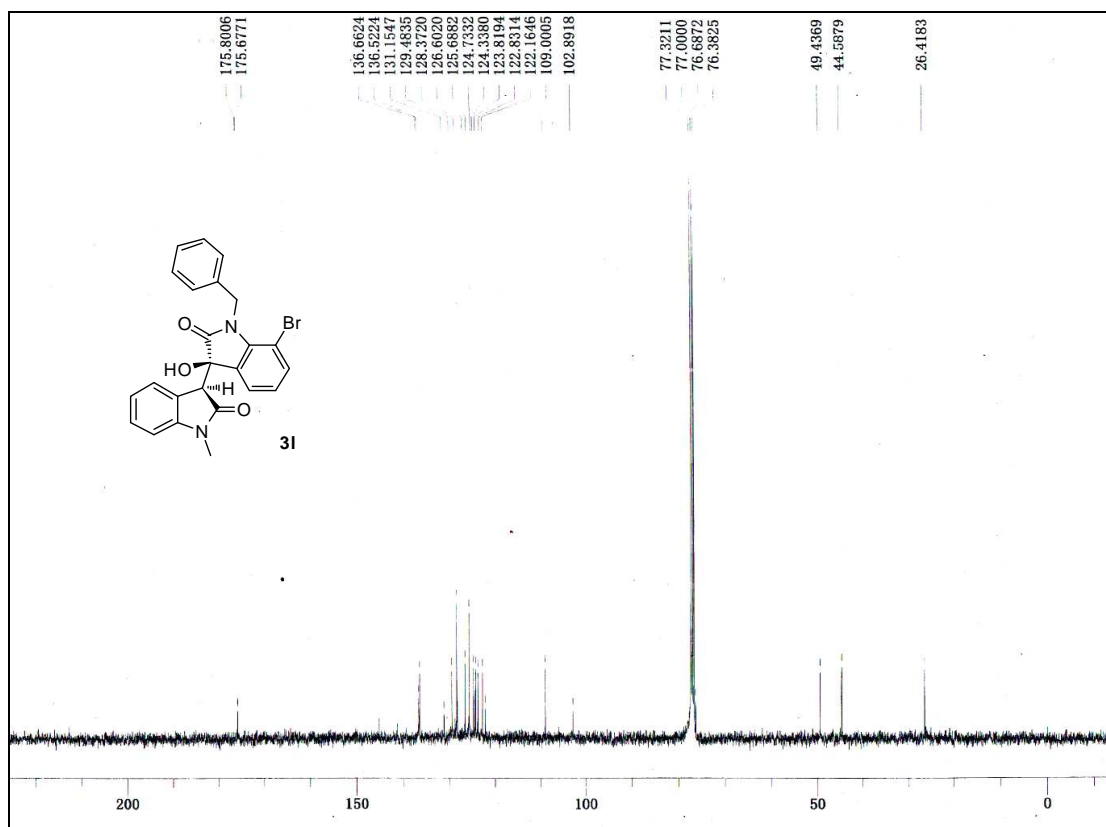

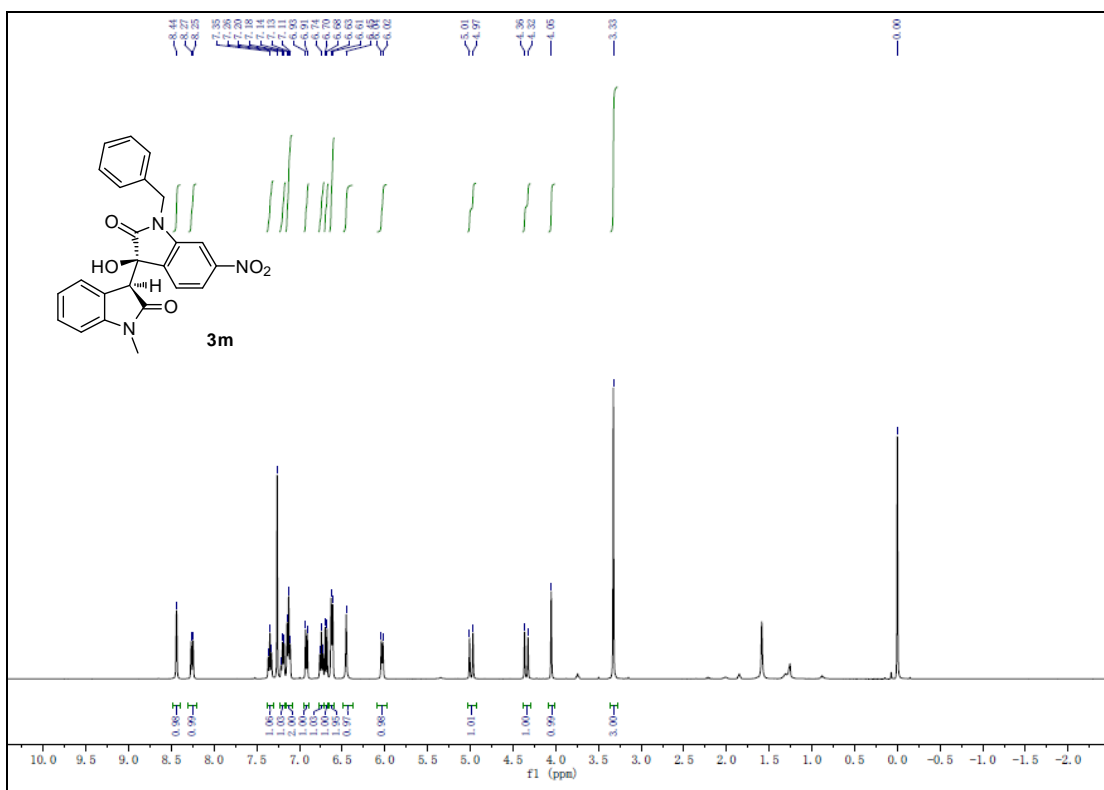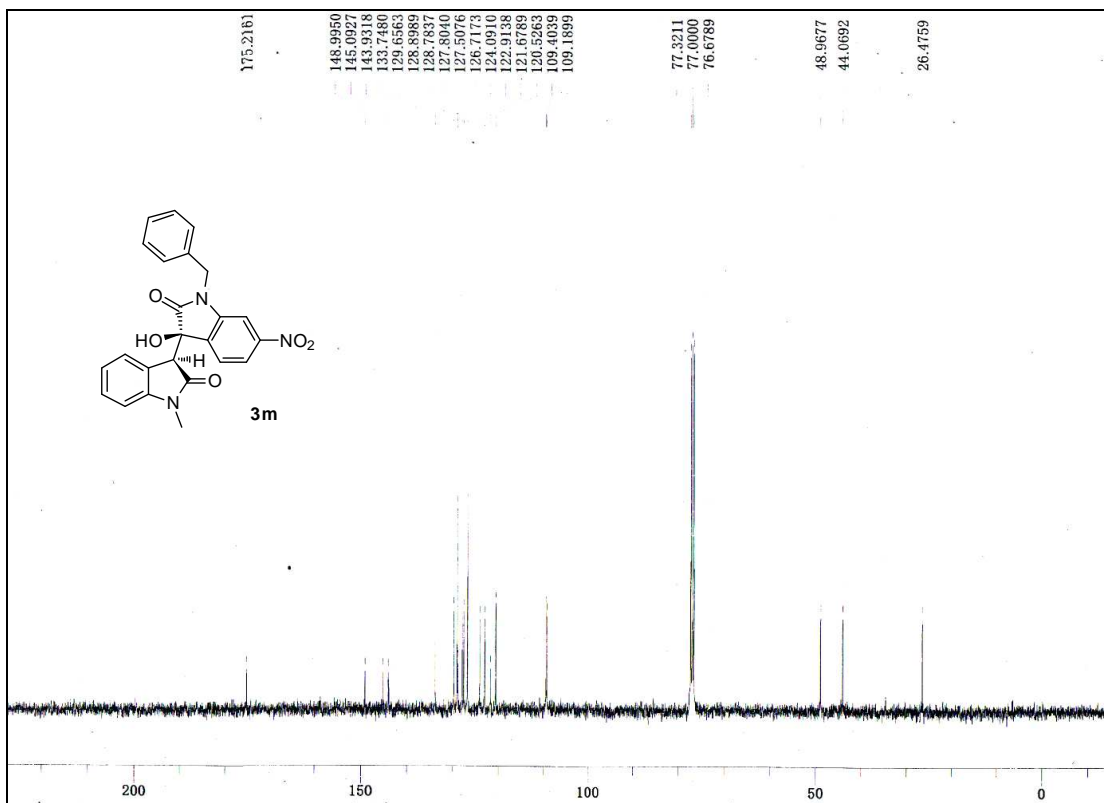

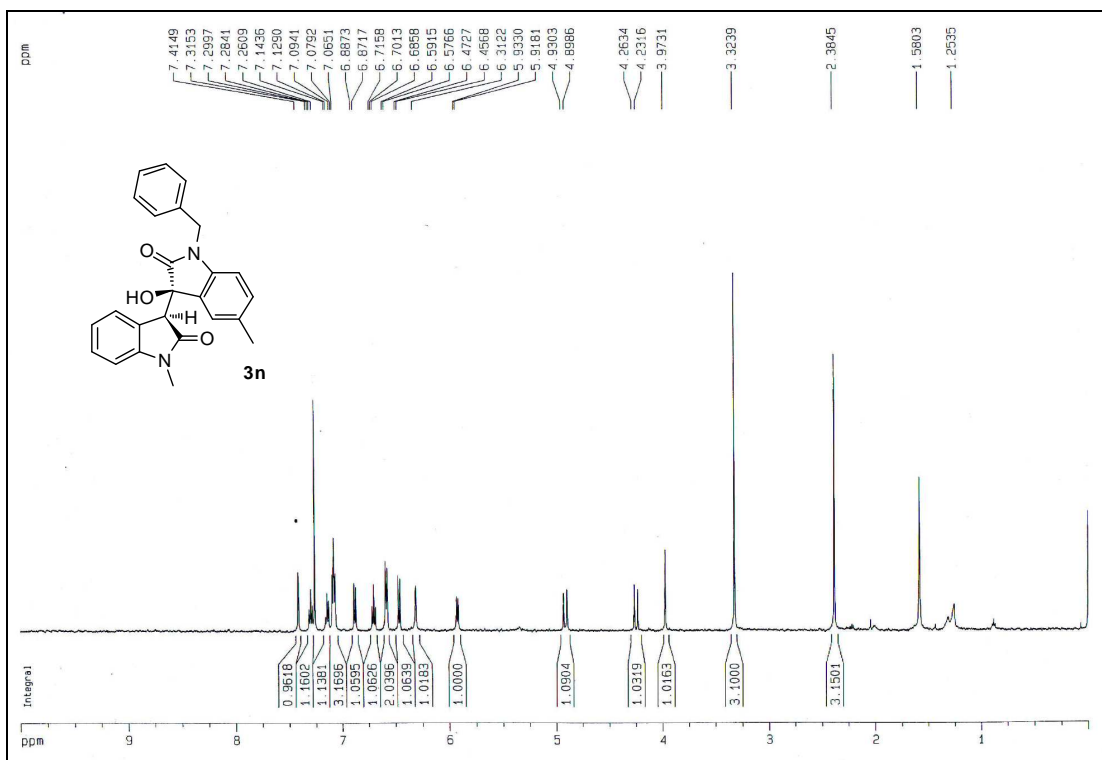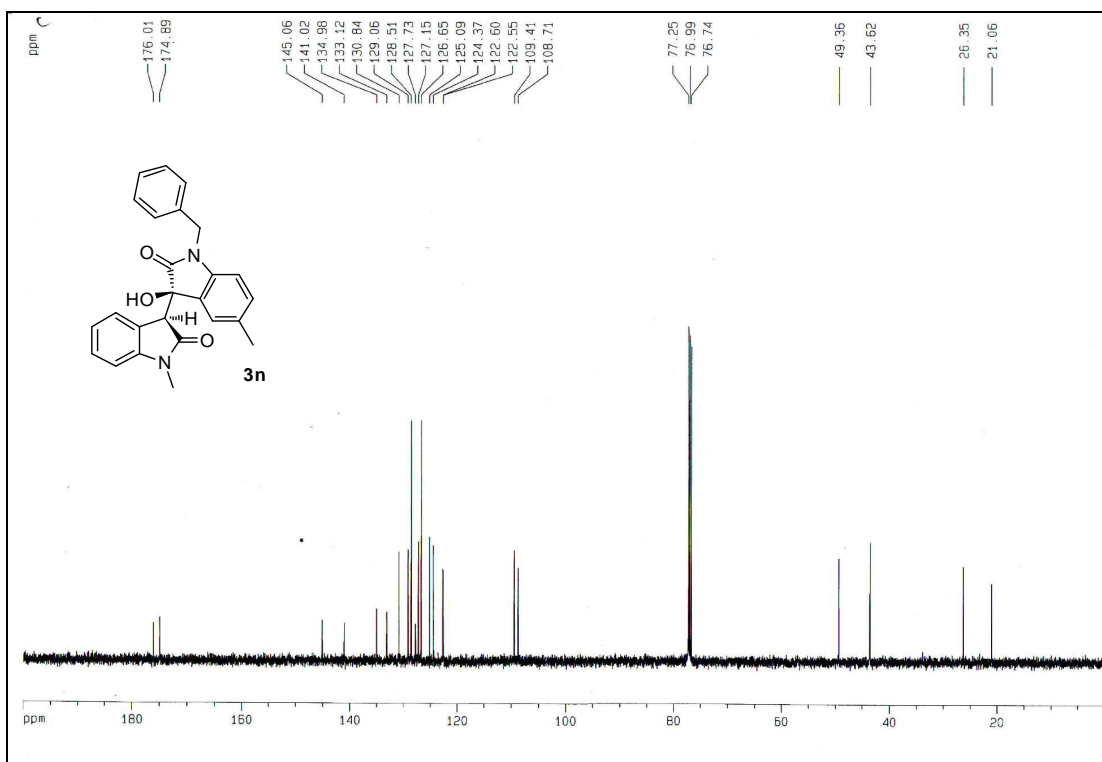



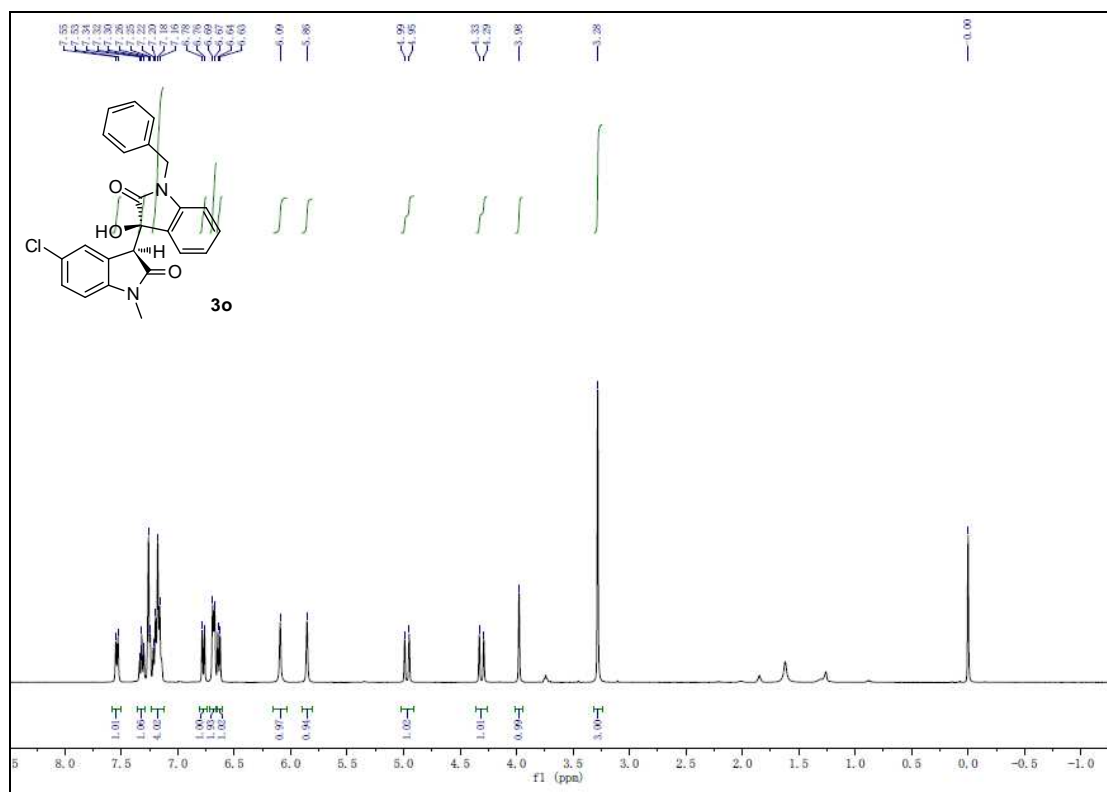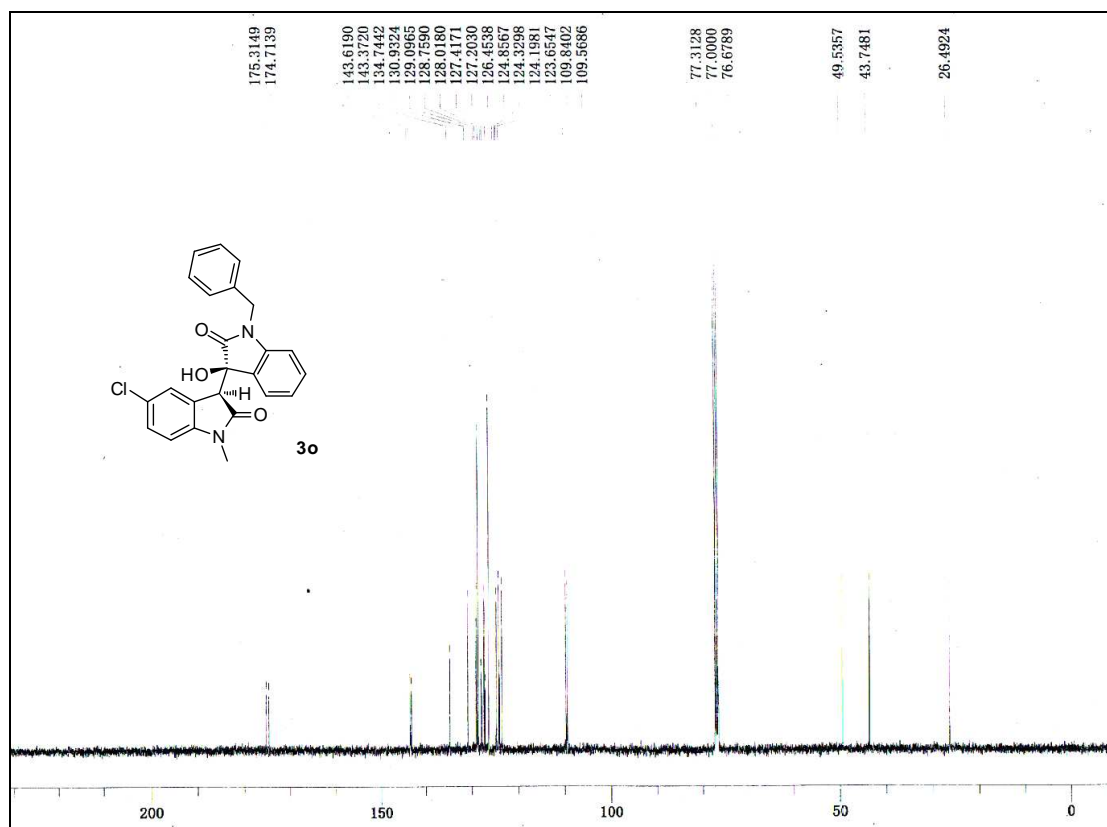

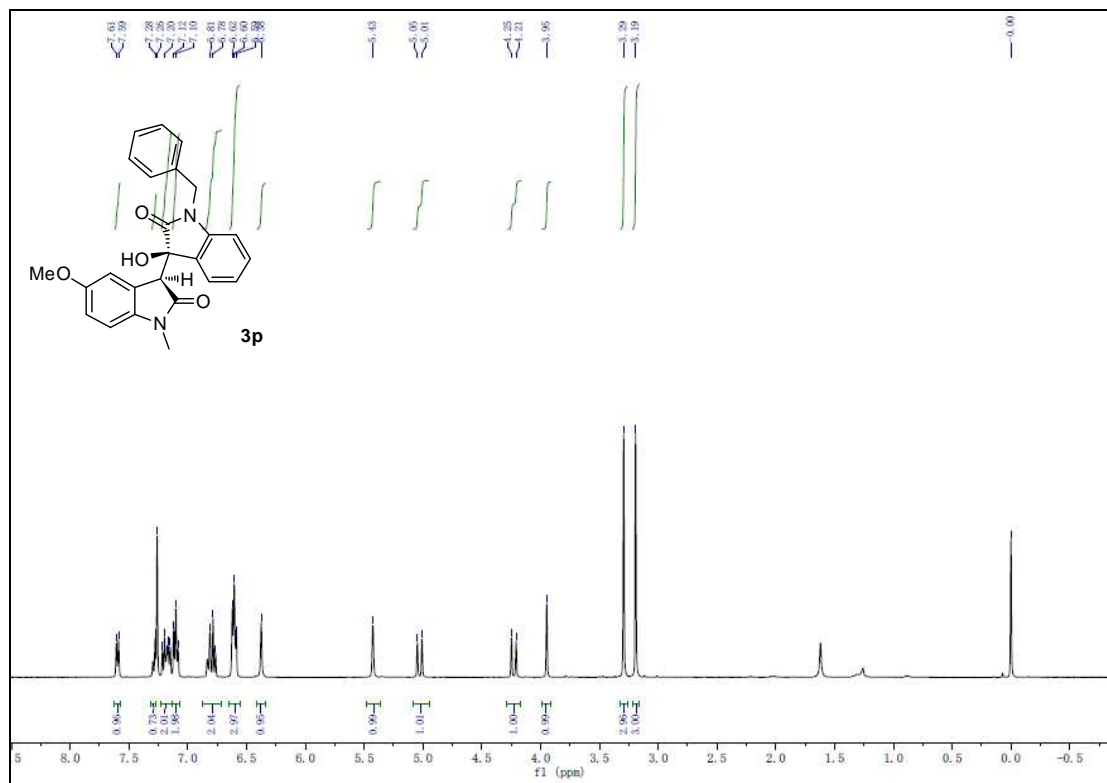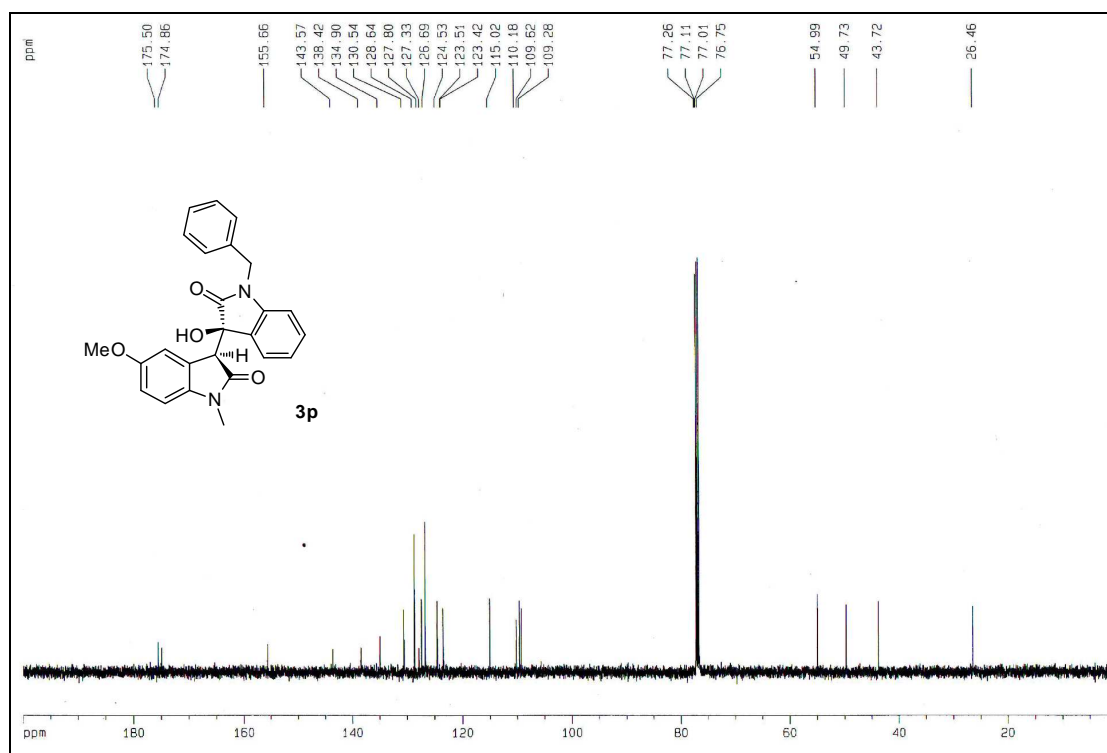

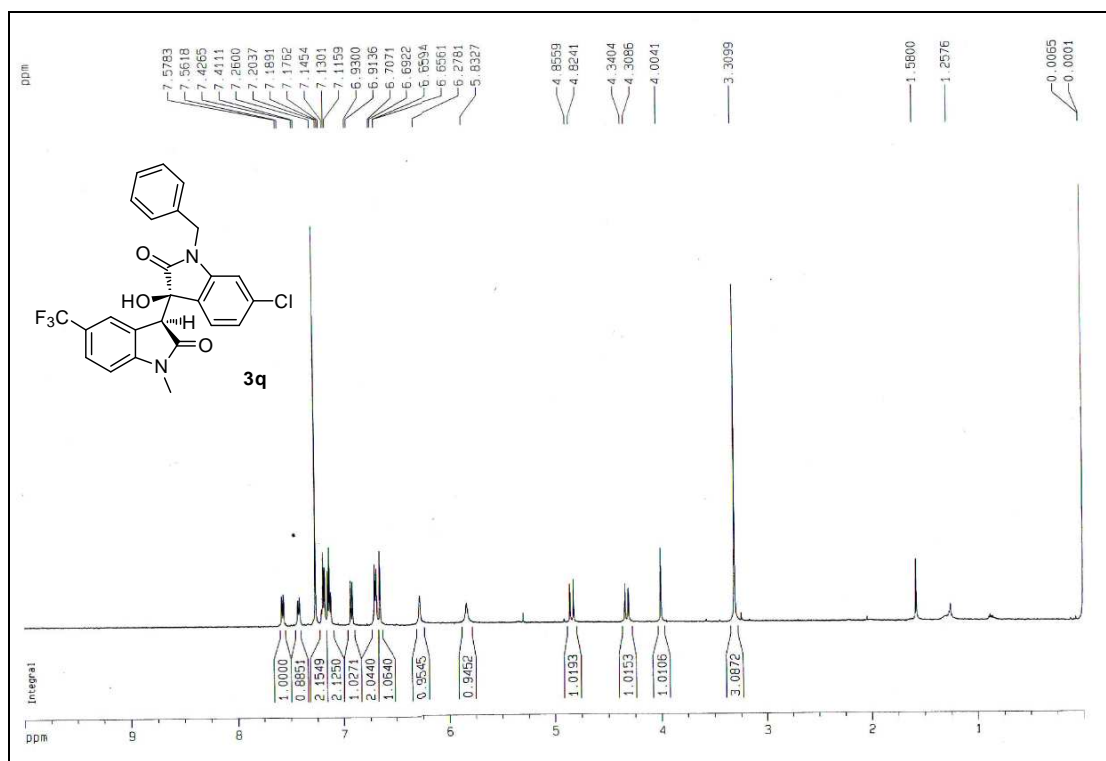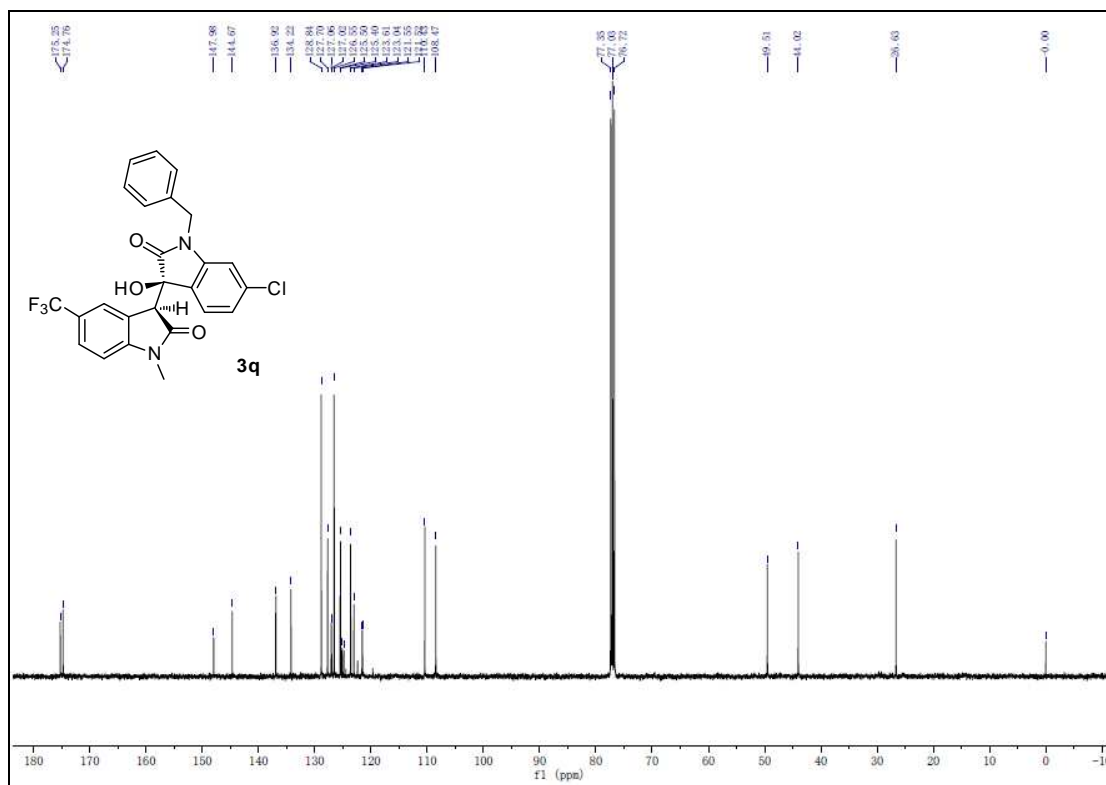

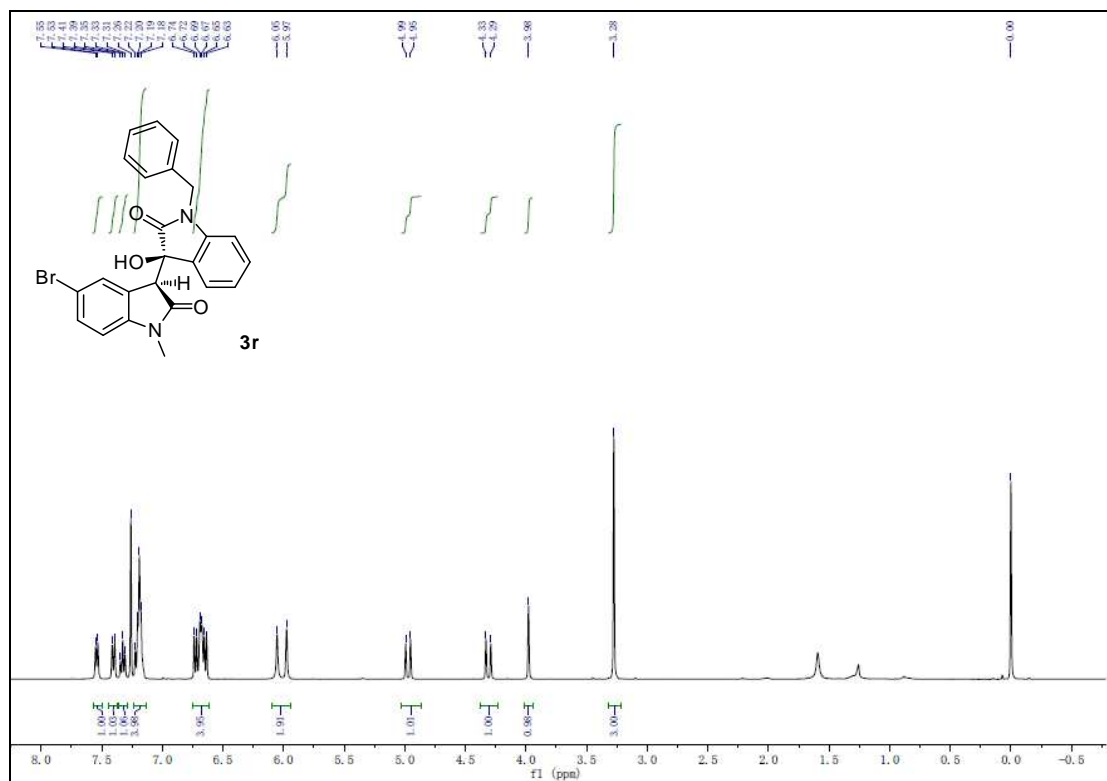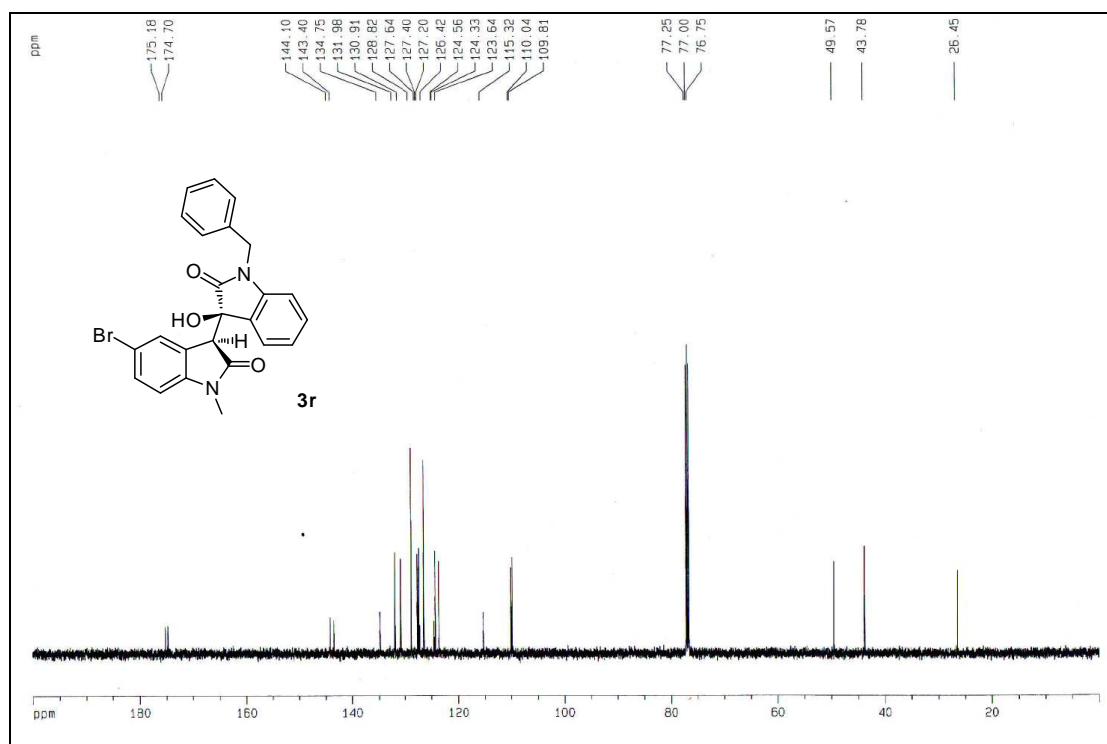

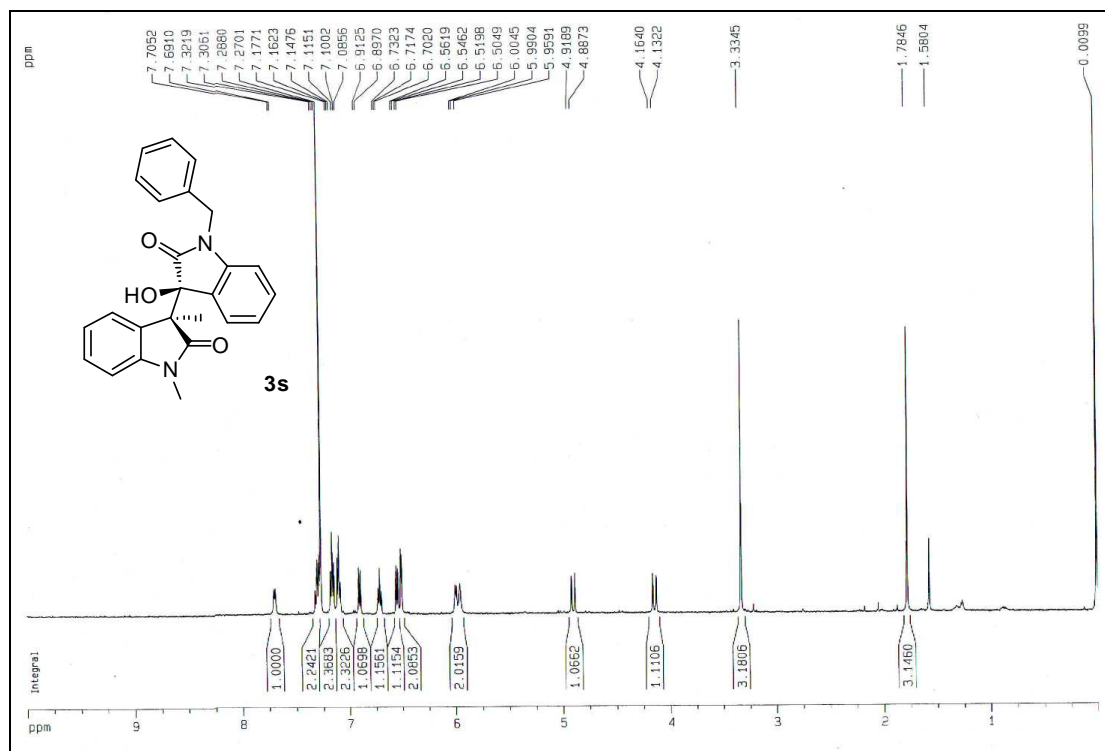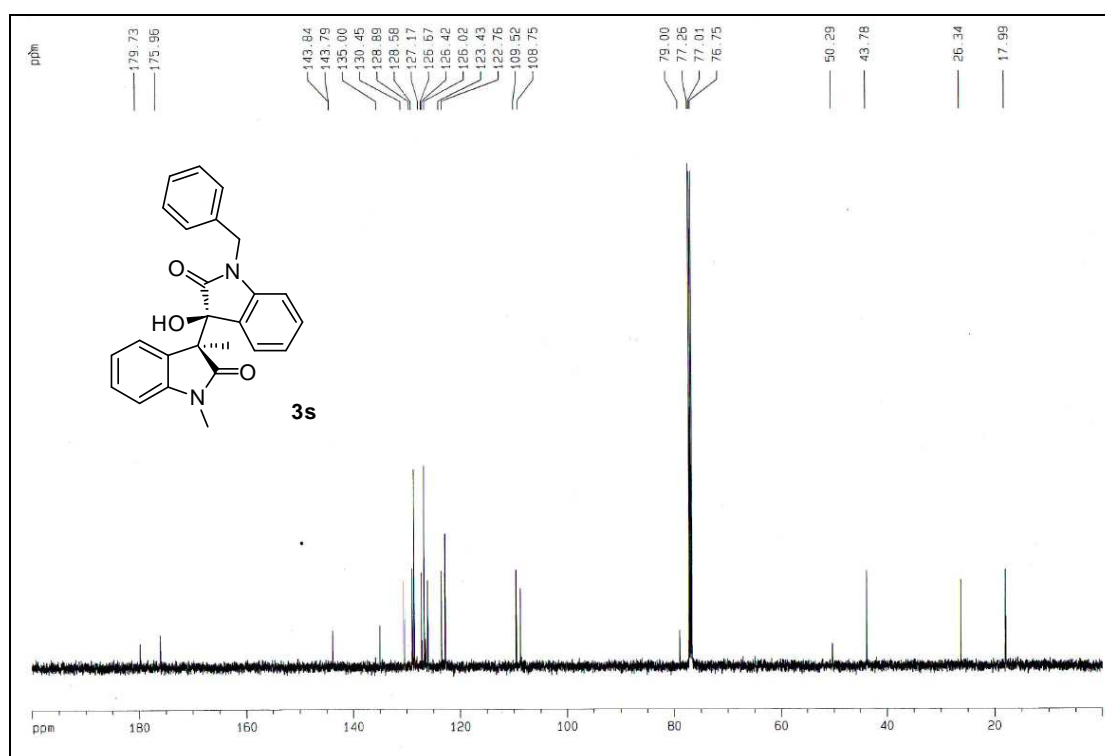

### 3. LC-MS spectrum for 3d

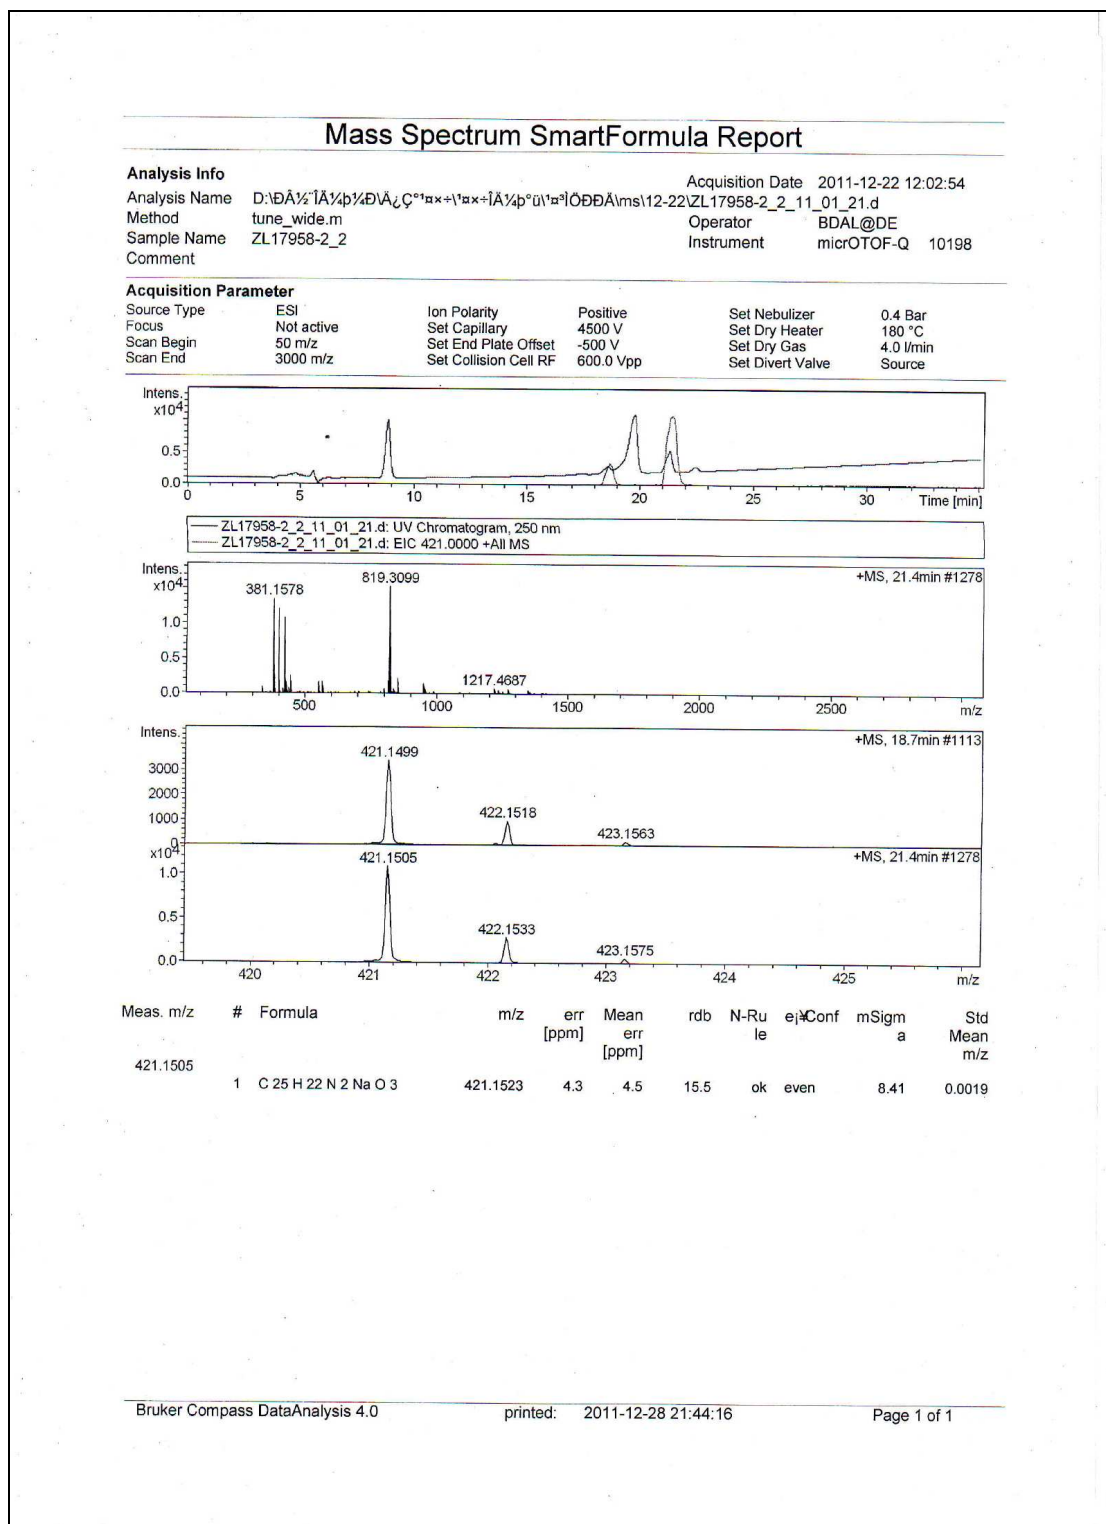

Supplement: c2ob26580j.pdf [file c2ob26580j.pdf]
